# Supplementary material for: The substituent effect on the photophysical and charge transport properties of non-planar dibenzo[a,m]rubicenes
Source: Royal Society of Chemistry journal article supplement (doi:10.1039/d1nj03308e), 2021-01-01
Supplement: d1nj03308e1.pdf [file d1nj03308e1.pdf]

## *Supporting Information*

### **The substituent effect on the photophysical and charge transport property of the non-planar dibenzo[*a,m*]rubicenes**

Lijuan Wang, Jianhong Dai, and Yan Song\*

*School of Materials Science and Engineering, Harbin Institute of Technology at Weihai, 2West Wenhua Road, Weihai, 264209, China*

Corresponding authors: sy@hitwh.edu.cn.

# Contents

**Figure S1** Side view of molecules 1 to 5, showing the changes of dihedral angles upon substitutions.

**Figure S2** Contributions of the vibrational modes to the relaxation energies for molecule 2, embedded with the normal modes contribute the most for the reorganization energies of hole and electron.

**Figure S3** Contributions of the vibrational modes to the relaxation energies for molecule 3, embedded with the normal modes contribute the most for the reorganization energies of hole and electron.

**Figure S4** Contributions of the vibrational modes to the relaxation energies for molecule 4, embedded with the normal modes contribute the most for the reorganization energies of hole and electron.

**Figure S5** Contributions of the vibrational modes to the relaxation energies for molecule 5, embedded with the normal modes contribute the most for the reorganization energies of hole and electron.

**Figure S6** The HOMO-1, LUMO+1 distributions of molecules 1 to 5.

**Figure S7** The HOMO-6 distributions of molecules 2, 3 and 5, the HOMO-10 distributions of molecule 4.

**Figure S8** The projecting angle-dependent hopping paths to a transistor channel in the *bc* plane (a) and the calculated angle-resolved anisotropic hole (b) and electron (c) mobilities of molecule 1.

**Figure S9.** The projecting angle-dependent hopping paths to a transistor channel in the *ac* plane (a) and the calculated angle-resolved anisotropic hole (b) and electron (c) mobilities of molecule 3.

**Figure S10** The projecting angle-dependent hopping paths to a transistor channel in the *bc* plane (a) and the calculated angle-resolved anisotropic hole (b) and electron (c) mobilities of molecule 4.

**Figure S11** The projecting angle-dependent hopping paths to a transistor channel in the *ab* plane (a) and the calculated angle-resolved anisotropic hole (b) and electron (c) mobilities of molecule 5.

**Table S1** the reorganization energies of hole ( $\lambda^+$ ) and electron ( $\lambda^-$ ) for molecules 1 to 5 using B3LYP functional and different basis sets.

**Table S2** The selected optimized bond lengths (in angstrom) and bond angles (in degree) of molecules 1 and 5 in the neutral and ionic states, respectively, together with experimental values.

**Table S3** Selected transfer integrals of hole ( $V_{\text{hole}}$ ) and electron ( $V_{\text{electron}}$ ) for the different hopping pathways of all the investigated molecules.

**Table S4** The relative probability of the charge hopping ( $P_i$ ) and the diffusion coefficient ( $D$ ) for the different hopping pathways of molecules 1 to 5.

**Table S5** The transfer integrals and charge mobilities of hole ( $V_{\text{hole}}$ ) and electron ( $V_{\text{electron}}$ ) for the different hopping pathways of molecule 2 based on B3LYP/6-31G (d, p) level.

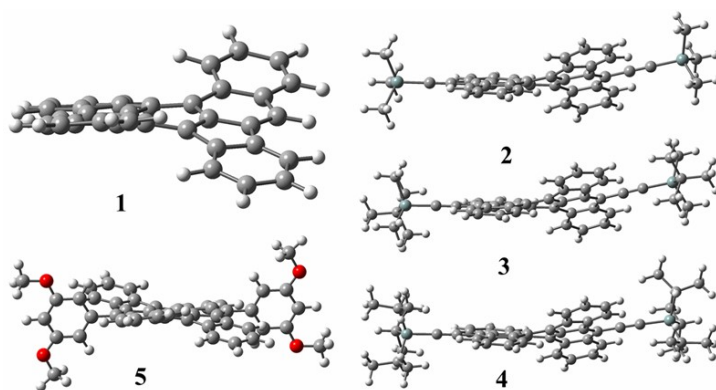

**Figure S1.** Side view of molecules 1 to 5, showing the changes of dihedral angles upon substitutions.

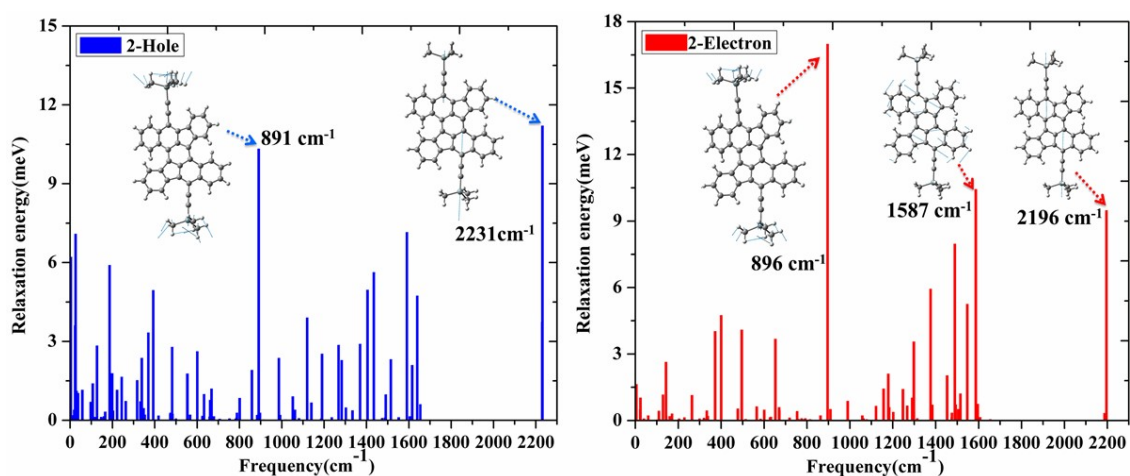

**Figure S2.** Contributions of the vibrational modes to the relaxation energies for molecule 2, embedded with the normal modes contribute the most for the reorganization energies of hole and electron.

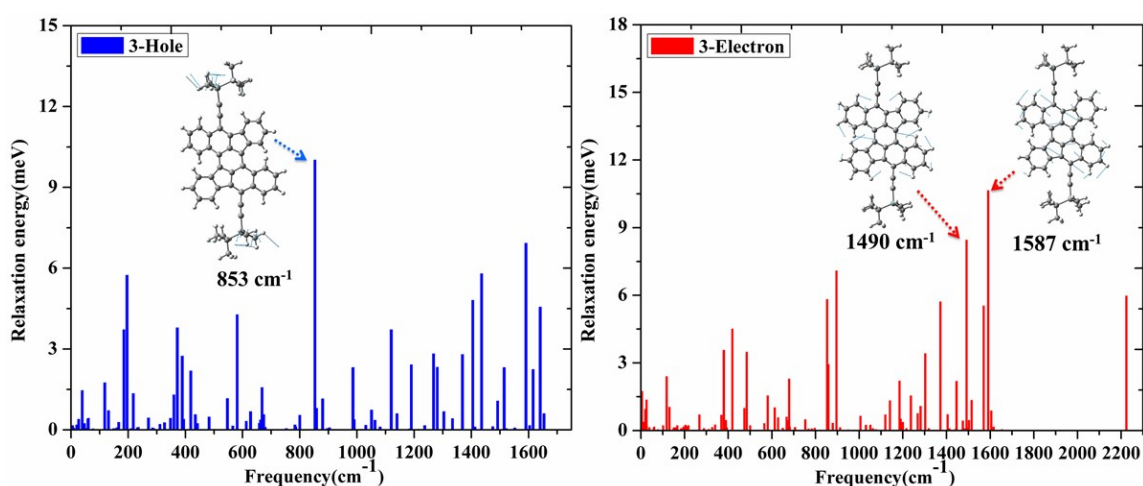

**Figure S3.** Contributions of the vibrational modes to the relaxation energies for molecule 3, embedded with the normal modes contribute the most for the reorganization energies of hole and electron.

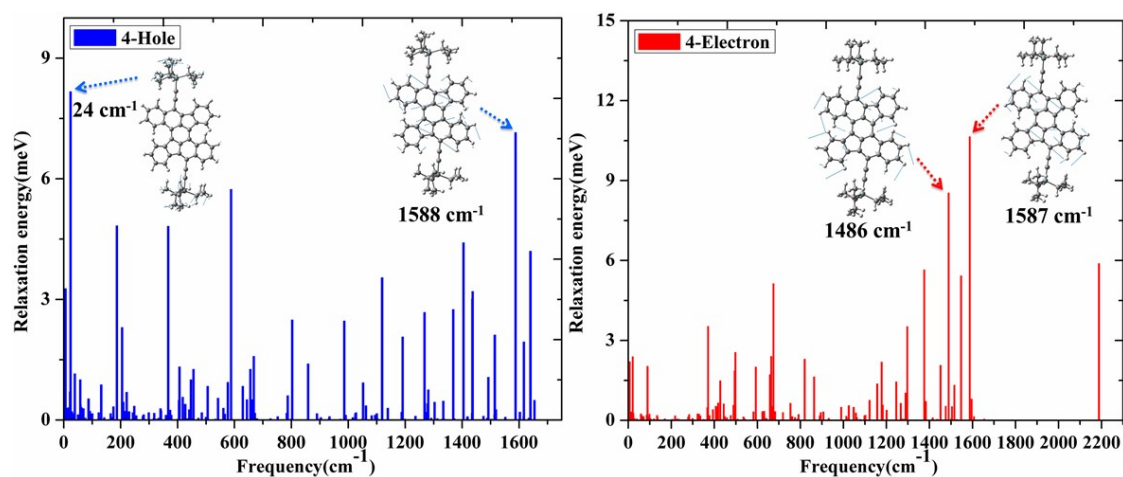

**Figure S4.** Contributions of the vibrational modes to the relaxation energies for molecule 4, embedded with the normal modes contribute the most for the reorganization energies of hole and electron.

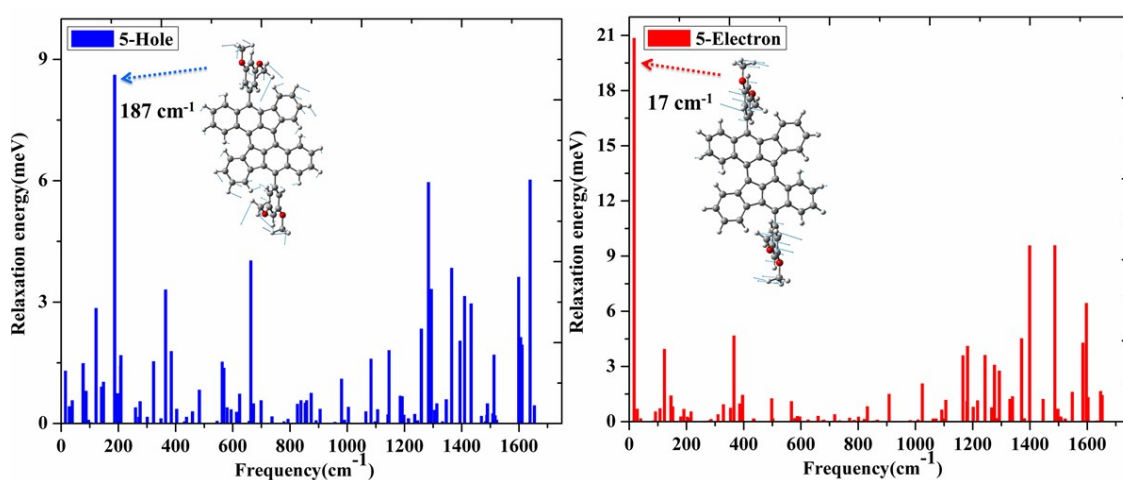

**Figure S5.** Contributions of the vibrational modes to the relaxation energies for molecule 5, embedded with the normal modes contribute the most for the reorganization energies of hole and electron.

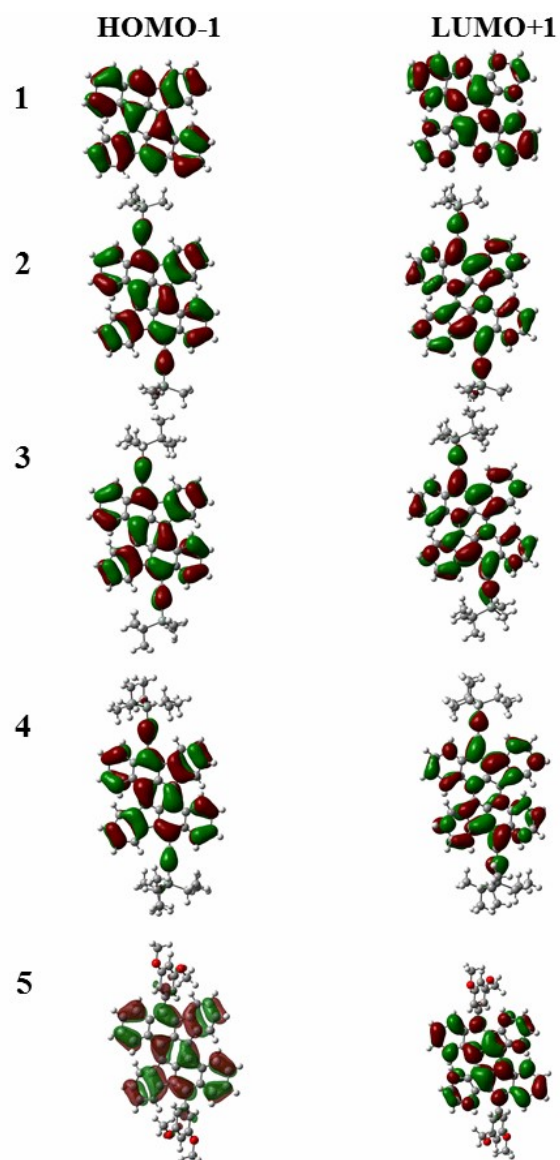

**Figure S6.** The HOMO-1, LUMO+1 distributions of molecules 1 to 5.

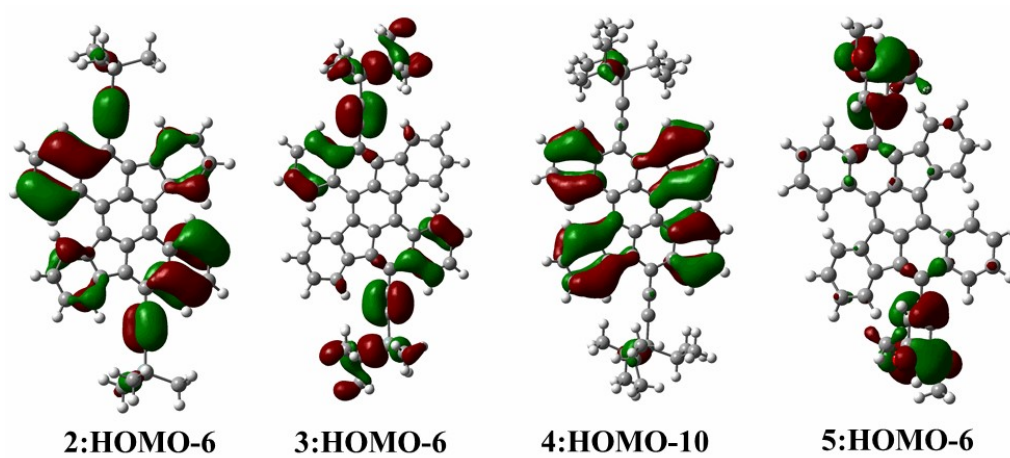

**Figure S7.** The HOMO-6 distributions of molecules 2, 3 and 5, the HOMO-10 distributions of molecule 4.

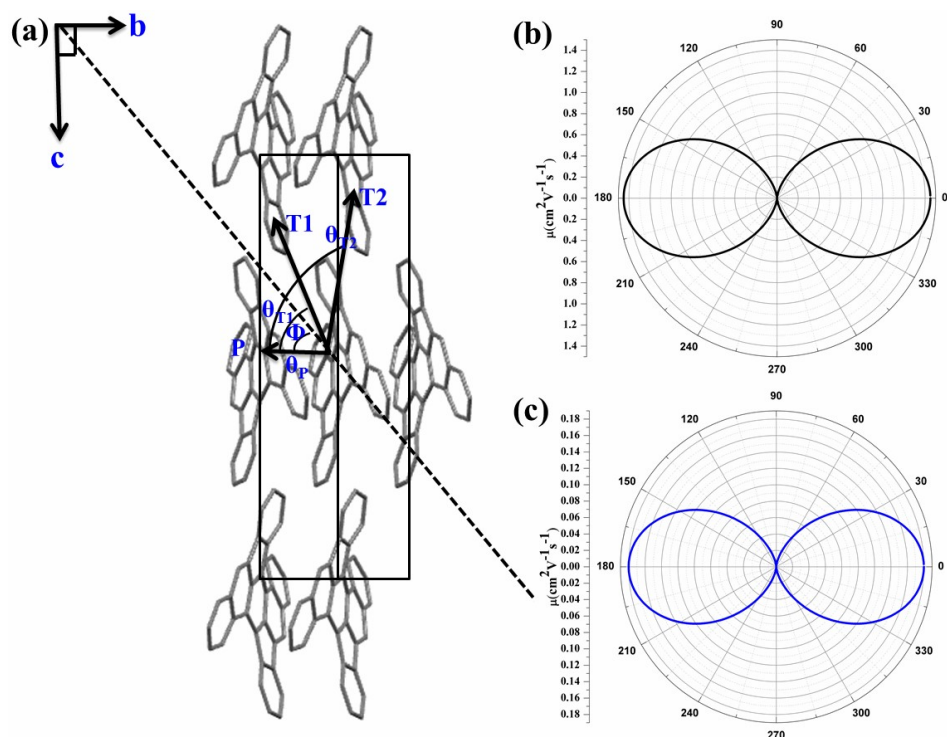

**Figure S8.** The projecting angle-dependent hopping paths to a transistor channel in the *bc* plane (a) and the calculated angle-resolved anisotropic hole (b) and electron (c) mobilities of molecule 1.

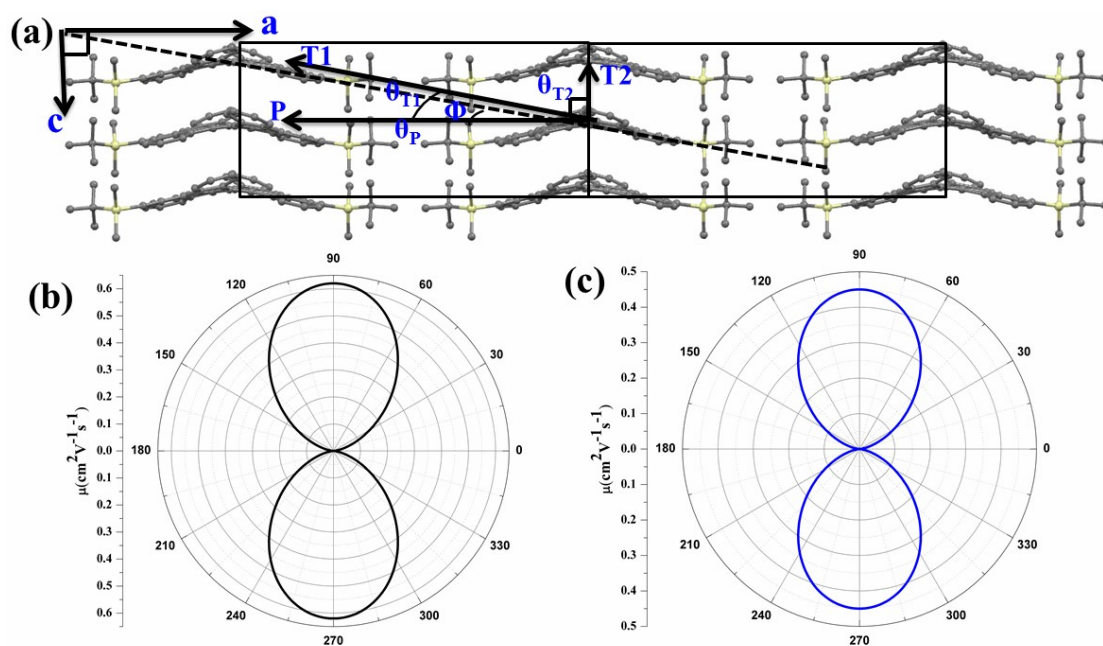

**Figure S9.** The projecting angle-dependent hopping paths to a transistor channel in the *ac* plane (a) and the calculated angle-resolved anisotropic hole (b) and electron (c) mobilities of molecule 3.



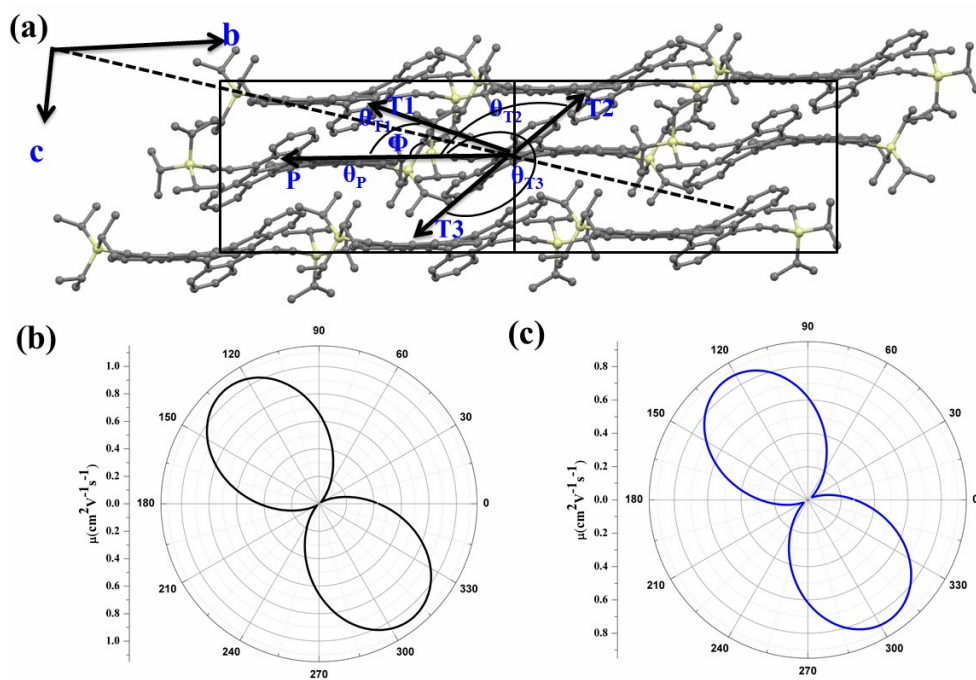

**Figure S10.** The projecting angle-dependent hopping paths to a transistor channel in the  $bc$  plane (a) and the calculated angle-resolved anisotropic hole (b) and electron (c) mobilities of molecule 4.

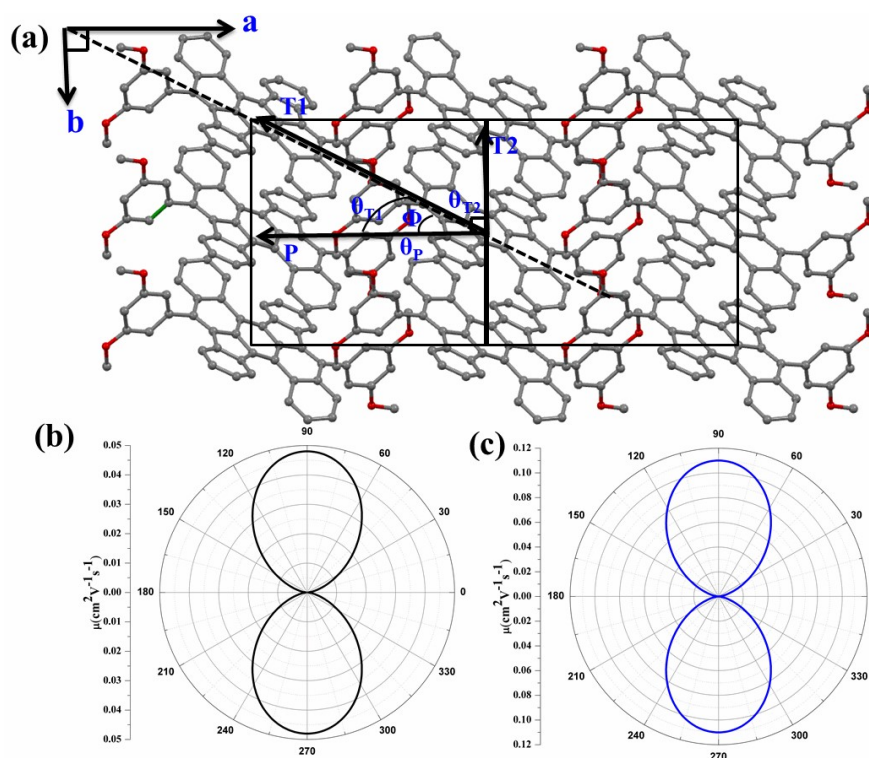

**Figure S11.** The projecting angle-dependent hopping paths to a transistor channel in the  $ab$  plane (a) and the calculated angle-resolved anisotropic hole (b) and electron (c) mobilities of molecule 5.

**Table S1.** the reorganization energies of hole ( $\lambda^+$ ) and electron ( $\lambda^-$ ) for molecules 1 to 5 using B3LYP functional and different basis sets.

| Molecules | $\lambda^+$ (eV) |               |                 | $\lambda^-$ (eV) |               |                 |
|-----------|------------------|---------------|-----------------|------------------|---------------|-----------------|
|           | 6-31G (d, p)     | 6-31+G (d, p) | 6-311++G (d, p) | 6-31G (d, p)     | 6-31+G (d, p) | 6-311++G (d, p) |
| 1         | 0.200            | 0.195         | 0.199           | 0.177            | 0.172         | 0.176           |
| 2         | 0.213            | 0.208         | 0.213           | 0.204            | 0.198         | 0.200           |
| 3         | 0.211            | 0.206         | 0.212           | 0.203            | 0.197         | 0.199           |
| 4         | 0.202            | 0.197         | 0.202           | 0.197            | 0.191         | 0.194           |
| 5         | 0.197            | 0.195         | 0.199           | 0.232            | 0.220         | 0.221           |



**Table S2.** The selected optimized bond lengths (in angstrom) and bond angles (in degree) of molecules 1 and 5 in the neutral and ionic states, respectively, together with experimental

| Comps.                     | Bond Parameters            | Neutral | Expt. | Cationic | $\Delta(\text{C-N})$ | Anionic | $\Delta(\text{A-N})$ |
|----------------------------|----------------------------|---------|-------|----------|----------------------|---------|----------------------|
| 1                          | R(C1-C2)                   | 1.44    | 1.44  | 1.43     | -0.01                | 1.42    | -0.02                |
|                            | R(C3-C6)                   | 1.44    | 1.44  | 1.42     | -0.02                | 1.43    | -0.01                |
|                            | R(C4-C5)                   | 1.49    | 1.49  | 1.46     | -0.03                | 1.46    | -0.03                |
|                            | R(C5-C6)                   | 1.42    | 1.41  | 1.45     | 0.03                 | 1.43    | 0.01                 |
|                            | $\theta(\text{C6-C7-C8})$  | 114.2   | 114.5 | 113.2    | -1.0                 | 114.6   | 0.4                  |
|                            | $\theta(\text{C5-C4-C11})$ | 133.1   | 133.3 | 132.2    | -0.9                 | 133.8   | 0.7                  |
| 2                          | R(C1-C2)                   | 1.46    | 1.47  | 1.46     | 0.00                 | 1.45    | -0.01                |
|                            | R(C3-C6)                   | 1.44    | 1.44  | 1.42     | -0.02                | 1.43    | -0.01                |
|                            | R(C4-C5)                   | 1.48    | 1.49  | 1.46     | -0.02                | 1.46    | -0.02                |
|                            | R(C5-C6)                   | 1.42    | 1.41  | 1.45     | 0.03                 | 1.43    | 0.01                 |
|                            | R(C13-Si14)                | 1.84    | 1.84  | 1.87     | 0.03                 | 1.82    | -0.02                |
|                            | $\theta(\text{C1-C2-C12})$ | 119.2   | 120.1 | 119.7    | 0.5                  | 119.5   | 0.3                  |
|                            | $\theta(\text{C6-C7-C8})$  | 114.6   | 114.7 | 113.7    | -0.9                 | 115.1   | 0.5                  |
| $\theta(\text{C5-C4-C11})$ | 132.6                      | 132.8   | 132.0 | -0.6     | 133.1                | 0.5     |                      |
| 3                          | R(C1-C2)                   | 1.47    | 1.46  | 1.46     | -0.01                | 1.45    | -0.02                |
|                            | R(C3-C6)                   | 1.44    | 1.45  | 1.42     | -0.02                | 1.43    | -0.01                |
|                            | R(C4-C5)                   | 1.48    | 1.48  | 1.46     | -0.02                | 1.46    | -0.02                |
|                            | R(C5-C6)                   | 1.42    | 1.41  | 1.45     | 0.03                 | 1.43    | 0.01                 |
|                            | R(C13-Si14)                | 1.85    | 1.83  | 1.87     | 0.02                 | 1.82    | -0.03                |
|                            | $\theta(\text{C1-C2-C12})$ | 118.9   | 119.0 | 119.5    | 0.6                  | 119.2   | 0.3                  |
|                            | $\theta(\text{C6-C7-C8})$  | 114.6   | 114.9 | 113.7    | -0.9                 | 115.1   | 0.5                  |
| $\theta(\text{C5-C4-C11})$ | 132.7                      | 132.6   | 132.1 | -0.6     | 133.2                | 0.5     |                      |
| 4                          | R(C1-C2)                   | 1.47    | 1.43  | 1.46     | -0.01                | 1.45    | -0.02                |
|                            | R(C3-C6)                   | 1.44    | 1.44  | 1.42     | -0.02                | 1.43    | -0.01                |
|                            | R(C4-C5)                   | 1.48    | 1.48  | 1.46     | -0.02                | 1.46    | -0.02                |
|                            | R(C5-C6)                   | 1.42    | 1.40  | 1.45     | 0.03                 | 1.43    | 0.01                 |
|                            | R(C13-Si14)                | 1.85    | 1.83  | 1.87     | 0.02                 | 1.83    | -0.02                |
|                            | $\theta(\text{C1-C2-C12})$ | 119.0   | 123.4 | 119.5    | 0.5                  | 119.3   | 0.3                  |
|                            | $\theta(\text{C6-C7-C8})$  | 114.6   | 117.0 | 113.7    | -0.9                 | 115.1   | 0.5                  |
| $\theta(\text{C5-C4-C11})$ | 132.7                      | 129.4   | 132.1 | -0.6     | 133.2                | 0.5     |                      |
| 5                          | R(C1-C2)                   | 1.46    | 1.45  | 1.45     | -0.01                | 1.44    | -0.02                |
|                            | R(C3-C6)                   | 1.44    | 1.44  | 1.42     | -0.02                | 1.43    | -0.01                |
|                            | R(C4-C5)                   | 1.48    | 1.49  | 1.46     | -0.02                | 1.46    | -0.02                |
|                            | R(C5-C6)                   | 1.42    | 1.41  | 1.45     | 0.03                 | 1.43    | 0.01                 |
|                            | $\theta(\text{C1-C2-C12})$ | 120.1   | 120.9 | 120.8    | 0.7                  | 121.0   | 0.9                  |
|                            | $\theta(\text{C6-C7-C8})$  | 115.1   | 115.4 | 114.4    | -0.7                 | 115.5   | 0.4                  |
|                            | $\theta(\text{C5-C4-C11})$ | 132.7   | 133.1 | 132.0    | -0.7                 | 133.1   | 0.4                  |

values<sup>31</sup>

**Table S3.** Selected transfer integrals of hole ( $V_{\text{hole}}$ ) and electron ( $V_{\text{electron}}$ ) for the different

| Compds. | Pathway    | Distance(Å) | $V_{\text{hole}}$ (meV) | $V_{\text{electron}}$ (meV) |
|---------|------------|-------------|-------------------------|-----------------------------|
| 1       | 7, 8       | 12.57       | $-7.7 \times 10^{-2}$   | 0.1                         |
|         | 9          | 11.73       | $9.9 \times 10^{-3}$    | $3.8 \times 10^{-4}$        |
|         | 10         | 11.15       | 3.3                     | -3.7                        |
|         | 11         | 11.91       | $2.7 \times 10^{-2}$    | -0.3                        |
|         | 12         | 12.28       | $-2.5 \times 10^{-3}$   | $9.1 \times 10^{-4}$        |
|         | 13, 14     | 10.96       | -0.5                    | -1.1                        |
|         | 2          | 5, 6        | 19.63                   | $3.4 \times 10^{-2}$        |
| 7, 8    |            | 19.98       | $-4.3 \times 10^{-2}$   | $9.5 \times 10^{-2}$        |
| 9, 10   |            | 13.66       | $-6.5 \times 10^{-4}$   | $8.5 \times 10^{-2}$        |
| 3       | 3, 4, 5, 6 | 21.58       | $9.3 \times 10^{-4}$    | $-4.4 \times 10^{-3}$       |
|         | 7, 8       | 21.24       | $1.2 \times 10^{-3}$    | $-4.3 \times 10^{-3}$       |
| 4       | 5          | 12.98       | $5.4 \times 10^{-3}$    | $3.3 \times 10^{-3}$        |
|         | 6          | 17.38       | -1.1                    | 0.2                         |
|         | 7          | 19.23       | $-2.3 \times 10^{-3}$   | $9.8 \times 10^{-4}$        |
|         | 8          | 10.31       | 0.2                     | 1.1                         |
|         | 9, 10      | 17.02       | $1.2 \times 10^{-3}$    | $5.3 \times 10^{-2}$        |
|         | 11, 12     | 23.12       | $3.7 \times 10^{-2}$    | $-4.9 \times 10^{-2}$       |
|         | 13         | 18.93       | $1.5 \times 10^{-2}$    | $-1.7 \times 10^{-2}$       |
|         | 14         | 13.41       | 0.2                     | -0.9                        |
|         | 15         | 19.28       | $-8.6 \times 10^{-3}$   | $-8.7 \times 10^{-3}$       |
|         | 16         | 16.07       | $2.0 \times 10^{-5}$    | $3.3 \times 10^{-4}$        |
| 5       | 5, 6       | 13.34       | $2.8 \times 10^{-4}$    | $-4.1 \times 10^{-5}$       |
|         | 13, 14     | 15.61       | $-7.2 \times 10^{-2}$   | 0.1                         |

hopping pathways of all the investigated molecules.

**Table S4.** The relative probability of the charge hopping ( $P_i$ ) and the diffusion coefficient ( $D$ ) for the different hopping pathways of molecules 1 to 5.

| Compd. | Pathway    | $P_{i,\text{hole}}$    | $D_{\text{hole}}$      | $P_{i,\text{electron}}$ | $D_{\text{electron}}$  |
|--------|------------|------------------------|------------------------|-------------------------|------------------------|
| 1      | 1, 2       | 0.50                   | $3.72 \times 10^{-2}$  | 0.49                    | $4.61 \times 10^{-3}$  |
|        | 3, 4       | $1.18 \times 10^{-4}$  | $2.08 \times 10^{-8}$  | $9.78 \times 10^{-4}$   | $1.86 \times 10^{-7}$  |
|        | 5, 6       | $5.49 \times 10^{-6}$  | $4.12 \times 10^{-11}$ | $6.82 \times 10^{-3}$   | $8.25 \times 10^{-6}$  |
|        | 7, 8       | $3.22 \times 10^{-7}$  | $1.60 \times 10^{-13}$ | $7.98 \times 10^{-6}$   | $1.27 \times 10^{-11}$ |
|        | 9          | $5.35 \times 10^{-9}$  | $3.82 \times 10^{-17}$ | $7.94 \times 10^{-11}$  | $1.10 \times 10^{-21}$ |
|        | 10         | $5.82 \times 10^{-4}$  | $4.10 \times 10^{-7}$  | $7.52 \times 10^{-3}$   | $8.88 \times 10^{-6}$  |
|        | 11         | $4.09 \times 10^{-8}$  | $2.31 \times 10^{-15}$ | $6.75 \times 10^{-5}$   | $8.15 \times 10^{-10}$ |
|        | 12         | $3.58 \times 10^{-10}$ | $1.88 \times 10^{-19}$ | $4.63 \times 10^{-10}$  | $4.08 \times 10^{-20}$ |
|        | 13, 14     | $1.62 \times 10^{-5}$  | $3.08 \times 10^{-10}$ | $6.41 \times 10^{-4}$   | $6.22 \times 10^{-8}$  |
| 2      | 1, 2       | 0.50                   | $1.57 \times 10^{-2}$  | 0.50                    | $6.48 \times 10^{-3}$  |
|        | 3, 4       | $1.49 \times 10^{-5}$  | $3.97 \times 10^{-10}$ | $9.75 \times 10^{-5}$   | $7.05 \times 10^{-9}$  |
|        | 5, 6       | $1.14 \times 10^{-7}$  | $2.26 \times 10^{-14}$ | $2.06 \times 10^{-7}$   | $3.05 \times 10^{-14}$ |
|        | 7, 8       | $1.85 \times 10^{-7}$  | $6.12 \times 10^{-14}$ | $2.48 \times 10^{-6}$   | $4.56 \times 10^{-12}$ |
|        | 9, 10      | $4.35 \times 10^{-11}$ | $1.58 \times 10^{-21}$ | $1.99 \times 10^{-6}$   | $1.38 \times 10^{-12}$ |
|        | 11, 12     | $4.25 \times 10^{-5}$  | $1.39 \times 10^{-9}$  | $9.66 \times 10^{-4}$   | $2.98 \times 10^{-7}$  |
|        | 13, 14     | $1.73 \times 10^{-4}$  | $2.21 \times 10^{-8}$  | $6.31 \times 10^{-5}$   | $1.22 \times 10^{-9}$  |
| 3      | 1, 2       | 0.50                   | $1.58 \times 10^{-2}$  | 0.50                    | $1.16 \times 10^{-2}$  |
|        | 3, 4, 5, 6 | $9.36 \times 10^{-11}$ | $1.78 \times 10^{-20}$ | $3.15 \times 10^{-9}$   | $1.49 \times 10^{-17}$ |
|        | 7, 8       | $1.44 \times 10^{-10}$ | $4.09 \times 10^{-20}$ | $2.89 \times 10^{-9}$   | $1.22 \times 10^{-17}$ |
|        | 9, 10      | $1.86 \times 10^{-5}$  | $4.30 \times 10^{-10}$ | $1.0 \times 10^{-3}$    | $9.65 \times 10^{-7}$  |
|        | 11, 12     | $1.29 \times 10^{-5}$  | $1.93 \times 10^{-10}$ | $8.79 \times 10^{-5}$   | $6.70 \times 10^{-9}$  |
|        | 13, 14     | $7.75 \times 10^{-5}$  | $7.33 \times 10^{-9}$  | $2.89 \times 10^{-3}$   | $7.58 \times 10^{-6}$  |
| 4      | 1          | 0.27                   | $7.06 \times 10^{-3}$  | 0.44                    | $1.77 \times 10^{-2}$  |
|        | 2          | 0.69                   | $4.78 \times 10^{-2}$  | 0.55                    | $2.89 \times 10^{-2}$  |
|        | 3, 4       | $2.07 \times 10^{-2}$  | $1.50 \times 10^{-4}$  | $2.74 \times 10^{-3}$   | $2.47 \times 10^{-6}$  |
|        | 5          | $7.92 \times 10^{-9}$  | $2.00 \times 10^{-17}$ | $3.35 \times 10^{-9}$   | $3.37 \times 10^{-18}$ |
|        | 6          | $3.54 \times 10^{-4}$  | $7.16 \times 10^{-8}$  | $7.87 \times 10^{-6}$   | $3.32 \times 10^{-11}$ |
|        | 7          | $1.41 \times 10^{-9}$  | $1.39 \times 10^{-18}$ | $3.00 \times 10^{-10}$  | $5.92 \times 10^{-20}$ |
|        | 8          | $6.74 \times 10^{-6}$  | $9.16 \times 10^{-12}$ | $3.48 \times 10^{-4}$   | $2.29 \times 10^{-8}$  |
|        | 9, 10      | $3.76 \times 10^{-10}$ | $7.74 \times 10^{-20}$ | $8.94 \times 10^{-7}$   | $4.11 \times 10^{-13}$ |

|   |           |                        |                        |                        |                        |
|---|-----------|------------------------|------------------------|------------------------|------------------------|
|   | 11, 12    | $3.79 \times 10^{-7}$  | $1.46 \times 10^{-13}$ | $7.44 \times 10^{-7}$  | $5.26 \times 10^{-13}$ |
|   | 13        | $6.37 \times 10^{-8}$  | $2.75 \times 10^{-15}$ | $9.30 \times 10^{-8}$  | $5.50 \times 10^{-15}$ |
|   | 14        | $9.51 \times 10^{-6}$  | $3.08 \times 10^{-11}$ | $2.73 \times 10^{-4}$  | $2.39 \times 10^{-8}$  |
|   | 15        | $2.04 \times 10^{-8}$  | $2.94 \times 10^{-16}$ | $2.35 \times 10^{-8}$  | $3.66 \times 10^{-16}$ |
|   | 16        | $1.05 \times 10^{-13}$ | $5.44 \times 10^{-27}$ | $3.35 \times 10^{-11}$ | $5.16 \times 10^{-22}$ |
| 5 | 1, 2      | 0.19                   | $4.97 \times 10^{-4}$  | 0.45                   | $2.50 \times 10^{-3}$  |
|   | 3, 4      | $1.93 \times 10^{-3}$  | $2.73 \times 10^{-7}$  | $4.65 \times 10^{-3}$  | $1.47 \times 10^{-6}$  |
|   | 5, 6      | $1.07 \times 10^{-10}$ | $8.35 \times 10^{-22}$ | $1.62 \times 10^{-12}$ | $1.78 \times 10^{-25}$ |
|   | 7, 8      | $7.92 \times 10^{-3}$  | $3.76 \times 10^{-6}$  | $2.89 \times 10^{-5}$  | $4.59 \times 10^{-11}$ |
|   | 9,10,11,1 | 0.15                   | $1.64 \times 10^{-3}$  | $2.46 \times 10^{-2}$  | $4.07 \times 10^{-5}$  |
|   | 2         |                        |                        |                        |                        |
|   | 13, 14    | $6.92 \times 10^{-6}$  | $4.82 \times 10^{-12}$ | $1.24 \times 10^{-5}$  | $1.43 \times 10^{-11}$ |

**Table S5.** The transfer integrals and charge mobilities of hole ( $V_{\text{hole}}$ ) and electron ( $V_{\text{electron}}$ ) for

| Compd. | Pathway | Distance<br>(Å) | $V_{\text{hole}}$<br>(meV) | $V_{\text{electron}}$<br>(meV) | $\mu_{\text{h,ave.}}$<br>( $\text{cm}^2\text{V}^{-1}\text{s}^{-1}$ ) | $\mu_{\text{e,ave.}}$<br>( $\text{cm}^2\text{V}^{-1}\text{s}^{-1}$ ) |
|--------|---------|-----------------|----------------------------|--------------------------------|----------------------------------------------------------------------|----------------------------------------------------------------------|
| 2      | 1, 2    | 3.74            | 64.4                       | -44.4                          | 0.17                                                                 | 0.09                                                                 |
|        | 3, 4    | 19.98           | -0.3                       | 0.5                            |                                                                      |                                                                      |
|        | 5, 6    | 19.63           | $3.0 \times 10^{-2}$       | $-2.4 \times 10^{-2}$          |                                                                      |                                                                      |
|        | 7, 8    | 19.98           | $-4.2 \times 10^{-2}$      | 0.1                            |                                                                      |                                                                      |
|        | 9, 10   | 13.66           | $5.1 \times 10^{-3}$       | $9.0 \times 10^{-2}$           |                                                                      |                                                                      |
|        | 11, 12  | 13.11           | -0.9                       | 1.9                            |                                                                      |                                                                      |
|        | 13, 14  | 12.86           | 1.5                        | -0.4                           |                                                                      |                                                                      |

the different hopping pathways of molecule 2 based on B3LYP/6-31G (d, p) level.

Cartesian coordinates of optimized S<sub>1</sub> geometry

Molecule 1 at B3LYP/6-31+G(d, p) level

|   |             |             |             |
|---|-------------|-------------|-------------|
| C | 0.69063400  | -2.67570400 | -0.09419000 |
| C | 1.98901600  | -3.15316300 | -0.01193300 |
| H | 2.21793200  | -4.20768400 | -0.13780400 |
| C | 3.04415300  | -2.24730100 | 0.28953700  |
| C | 4.36580900  | -2.72809900 | 0.50902600  |
| H | 4.55650300  | -3.79007600 | 0.37677400  |
| C | 5.38176900  | -1.88647500 | 0.91519800  |
| H | 6.37901200  | -2.27984400 | 1.08948600  |
| C | 5.11136700  | -0.51727900 | 1.14251800  |
| H | 5.89149400  | 0.13588600  | 1.52175300  |
| C | 3.84654600  | -0.00983500 | 0.89733400  |
| H | 3.64641700  | 1.03123900  | 1.11751100  |
| C | 2.79317700  | -0.82856100 | 0.42266000  |
| C | 1.45705200  | -0.32466500 | 0.15887400  |
| C | 1.00283700  | 1.01981400  | -0.03900800 |
| C | 1.61679200  | 2.27797700  | -0.36483800 |
| C | 2.93483500  | 2.63393700  | -0.74920400 |
| H | 3.71087600  | 1.88341400  | -0.82971200 |
| C | 3.22637500  | 3.95451700  | -1.06049800 |
| H | 4.23403400  | 4.22420000  | -1.36111400 |
| C | 2.22827700  | 4.95283400  | -1.00050900 |
| H | 2.48535400  | 5.98089800  | -1.23775100 |
| C | 0.91023300  | 4.62747000  | -0.66801300 |
| H | 0.14384300  | 5.39706100  | -0.65910000 |
| C | 0.59053600  | 3.30272800  | -0.37321200 |
| C | -0.69063400 | 2.67570400  | -0.09419000 |
| C | -1.98901600 | 3.15316300  | -0.01193400 |
| H | -2.21793200 | 4.20768400  | -0.13780500 |
| C | -3.04415300 | 2.24730200  | 0.28953700  |
| C | -4.36580900 | 2.72809900  | 0.50902600  |
| H | -4.55650300 | 3.79007600  | 0.37677400  |
| C | -5.38176900 | 1.88647500  | 0.91519800  |
| H | -6.37901200 | 2.27984400  | 1.08948500  |
| C | -5.11136700 | 0.51728000  | 1.14251800  |
| H | -5.89149400 | -0.13588500 | 1.52175200  |
| C | -3.84654600 | 0.00983500  | 0.89733500  |
| H | -3.64641700 | -1.03123800 | 1.11751200  |
| C | -2.79317700 | 0.82856100  | 0.42266100  |

|   |             |             |             |
|---|-------------|-------------|-------------|
| C | -1.45705200 | 0.32466500  | 0.15887400  |
| C | -0.43319200 | 1.28286900  | 0.04625000  |
| C | -1.00283700 | -1.01981400 | -0.03900700 |
| C | 0.43319200  | -1.28286900 | 0.04625000  |
| C | -1.61679200 | -2.27797700 | -0.36483800 |
| C | -2.93483500 | -2.63393700 | -0.74920400 |
| H | -3.71087600 | -1.88341500 | -0.82971200 |
| C | -3.22637400 | -3.95451700 | -1.06049800 |
| H | -4.23403400 | -4.22420000 | -1.36111500 |
| C | -2.22827700 | -4.95283400 | -1.00050900 |
| H | -2.48535300 | -5.98089800 | -1.23775200 |
| C | -0.91023300 | -4.62747000 | -0.66801300 |
| H | -0.14384300 | -5.39706100 | -0.65910000 |
| C | -0.59053600 | -3.30272800 | -0.37321200 |

Molecule 1 at PBE0/6-31+G(d, p) level

|   |             |             |             |
|---|-------------|-------------|-------------|
| C | 0.66796600  | -2.67185400 | -0.08908300 |
| C | 1.95955500  | -3.15683400 | -0.00803700 |
| H | 2.18277800  | -4.21300700 | -0.13465600 |
| C | 3.01660900  | -2.25841700 | 0.29119900  |
| C | 4.33188700  | -2.74526200 | 0.50831000  |
| H | 4.51629200  | -3.80887400 | 0.37735700  |
| C | 5.35016000  | -1.91024200 | 0.90961500  |
| H | 6.34574400  | -2.30888100 | 1.08268300  |
| C | 5.08847700  | -0.54278400 | 1.13555600  |
| H | 5.87278700  | 0.10621700  | 1.51401400  |
| C | 3.82992800  | -0.03040600 | 0.89250900  |
| H | 3.63153300  | 1.01234800  | 1.11312400  |
| C | 2.77607900  | -0.84437400 | 0.42185800  |
| C | 1.44940500  | -0.33454600 | 0.16148200  |
| C | 1.00618800  | 1.00829300  | -0.03719000 |
| C | 1.62783200  | 2.25616000  | -0.36377300 |
| C | 2.94464800  | 2.59560300  | -0.75254500 |
| H | 3.71185100  | 1.83483900  | -0.83816200 |
| C | 3.24661300  | 3.90984700  | -1.06354700 |
| H | 4.25552600  | 4.16999500  | -1.36924200 |
| C | 2.26127000  | 4.91474300  | -0.99938400 |
| H | 2.52791600  | 5.94047000  | -1.23760900 |
| C | 0.94444200  | 4.60389600  | -0.66412400 |
| H | 0.18482200  | 5.38061300  | -0.65302100 |
| C | 0.61515300  | 3.28552800  | -0.36937000 |
| C | -0.66796600 | 2.67185400  | -0.08908200 |
| C | -1.95955500 | 3.15683400  | -0.00803600 |



|   |             |             |             |
|---|-------------|-------------|-------------|
| H | -2.18277800 | 4.21300700  | -0.13465400 |
| C | -3.01660900 | 2.25841700  | 0.29120000  |
| C | -4.33188700 | 2.74526200  | 0.50831000  |
| H | -4.51629200 | 3.80887400  | 0.37735800  |
| C | -5.35016000 | 1.91024200  | 0.90961500  |
| H | -6.34574400 | 2.30888000  | 1.08268200  |
| C | -5.08847700 | 0.54278300  | 1.13555400  |
| H | -5.87278700 | -0.10621800 | 1.51401100  |
| C | -3.82992800 | 0.03040500  | 0.89250800  |
| H | -3.63153300 | -1.01234900 | 1.11312300  |
| C | -2.77607900 | 0.84437400  | 0.42185900  |
| C | -1.44940500 | 0.33454600  | 0.16148200  |
| C | -0.42151200 | 1.28148300  | 0.05077600  |
| C | -1.00618800 | -1.00829300 | -0.03719000 |
| C | 0.42151300  | -1.28148300 | 0.05077600  |
| C | -1.62783100 | -2.25615900 | -0.36377300 |
| C | -2.94464800 | -2.59560300 | -0.75254500 |
| H | -3.71185100 | -1.83483800 | -0.83816100 |
| C | -3.24661300 | -3.90984700 | -1.06354600 |
| H | -4.25552700 | -4.16999400 | -1.36924000 |
| C | -2.26127100 | -4.91474300 | -0.99938300 |
| H | -2.52791700 | -5.94047000 | -1.23760700 |
| C | -0.94444200 | -4.60389500 | -0.66412400 |
| H | -0.18482200 | -5.38061300 | -0.65302100 |
| C | -0.61515300 | -3.28552800 | -0.36937100 |

Molecule 1 at BMK/6-31+G(d, p) level

|   |            |             |             |
|---|------------|-------------|-------------|
| C | 0.67319800 | -2.68790100 | -0.08536900 |
| C | 1.96741900 | -3.17748700 | -0.00194700 |
| H | 2.18919700 | -4.23662900 | -0.12534400 |
| C | 3.03293000 | -2.27213800 | 0.29494500  |
| C | 4.35604400 | -2.76505800 | 0.51239700  |
| H | 4.53695400 | -3.83183900 | 0.38618000  |
| C | 5.38122500 | -1.92582500 | 0.90556900  |
| H | 6.37875200 | -2.32481000 | 1.07805300  |
| C | 5.12103600 | -0.54621600 | 1.12459500  |
| H | 5.91032500 | 0.10407300  | 1.49584600  |
| C | 3.85822200 | -0.02956100 | 0.88394700  |
| H | 3.66085400 | 1.01546200  | 1.10052000  |
| C | 2.79349700 | -0.85119000 | 0.41983100  |
| C | 1.45827000 | -0.33828300 | 0.16114500  |
| C | 1.01364400 | 1.01479400  | -0.03623800 |
| C | 1.63853400 | 2.27066400  | -0.36290500 |

|   |             |             |             |
|---|-------------|-------------|-------------|
| C | 2.96291100  | 2.61559000  | -0.75353200 |
| H | 3.73261800  | 1.85538700  | -0.84155100 |
| C | 3.26381500  | 3.93820100  | -1.06319800 |
| H | 4.27447500  | 4.20019300  | -1.36852100 |
| C | 2.27212100  | 4.94805500  | -0.99708000 |
| H | 2.53748600  | 5.97645000  | -1.23399300 |
| C | 0.94851700  | 4.63138700  | -0.66019500 |
| H | 0.18429200  | 5.40667200  | -0.64685400 |
| C | 0.62195400  | 3.30582300  | -0.36662000 |
| C | -0.67319800 | 2.68790000  | -0.08537100 |
| C | -1.96741800 | 3.17748700  | -0.00194700 |
| H | -2.18919500 | 4.23662900  | -0.12534300 |
| C | -3.03293000 | 2.27213800  | 0.29494500  |
| C | -4.35604300 | 2.76506000  | 0.51239800  |
| H | -4.53695200 | 3.83184200  | 0.38618200  |
| C | -5.38122400 | 1.92582700  | 0.90556800  |
| H | -6.37875100 | 2.32481300  | 1.07805300  |
| C | -5.12103600 | 0.54621800  | 1.12459400  |
| H | -5.91032700 | -0.10407000 | 1.49584400  |
| C | -3.85822300 | 0.02956300  | 0.88394500  |
| H | -3.66085600 | -1.01546100 | 1.10051800  |
| C | -2.79349700 | 0.85119000  | 0.41983100  |
| C | -1.45827100 | 0.33828300  | 0.16114400  |
| C | -0.42569100 | 1.28948700  | 0.05059800  |
| C | -1.01364600 | -1.01479600 | -0.03623600 |
| C | 0.42569000  | -1.28948800 | 0.05060100  |
| C | -1.63853500 | -2.27066400 | -0.36290300 |
| C | -2.96291200 | -2.61559200 | -0.75353100 |
| H | -3.73262000 | -1.85538900 | -0.84154900 |
| C | -3.26381500 | -3.93820200 | -1.06319800 |
| H | -4.27447400 | -4.20019600 | -1.36852100 |
| C | -2.27211900 | -4.94805600 | -0.99708000 |
| H | -2.53748300 | -5.97645000 | -1.23399400 |
| C | -0.94851600 | -4.63138800 | -0.66019500 |
| H | -0.18429000 | -5.40667300 | -0.64685500 |
| C | -0.62195300 | -3.30582400 | -0.36661900 |

Molecule 1 at M062X/6-31+G(d, p) level

|   |            |             |             |
|---|------------|-------------|-------------|
| C | 0.63484900 | -2.68241100 | -0.07886500 |
| C | 1.91709600 | -3.18277600 | 0.00137200  |
| H | 2.12788600 | -4.24154700 | -0.12302400 |
| C | 2.98839700 | -2.29242200 | 0.29416300  |
| C | 4.30070700 | -2.79534200 | 0.50858700  |

|   |             |             |             |
|---|-------------|-------------|-------------|
| H | 4.47068100  | -3.86141500 | 0.38307500  |
| C | 5.32847600  | -1.96954900 | 0.89741200  |
| H | 6.32012000  | -2.37635000 | 1.06801700  |
| C | 5.08271300  | -0.59405500 | 1.11728700  |
| H | 5.87655700  | 0.04579200  | 1.48892000  |
| C | 3.83148000  | -0.06912500 | 0.88024900  |
| H | 3.63958100  | 0.97522100  | 1.09879200  |
| C | 2.76611100  | -0.87924500 | 0.41750100  |
| C | 1.44533900  | -0.35452100 | 0.16285300  |
| C | 1.02157300  | 0.99696900  | -0.03452600 |
| C | 1.65954100  | 2.23724700  | -0.36144100 |
| C | 2.98035800  | 2.55815000  | -0.75916900 |
| H | 3.73459900  | 1.78618900  | -0.85632000 |
| C | 3.29763600  | 3.87000800  | -1.06627100 |
| H | 4.30720000  | 4.11679700  | -1.37781100 |
| C | 2.32742400  | 4.88956900  | -0.99249200 |
| H | 2.60735800  | 5.91123900  | -1.22878800 |
| C | 1.00734800  | 4.59520800  | -0.65201300 |
| H | 0.25653600  | 5.37972400  | -0.63469100 |
| C | 0.66442300  | 3.28065700  | -0.36033200 |
| C | -0.63484900 | 2.68241100  | -0.07886500 |
| C | -1.91709600 | 3.18277600  | 0.00137200  |
| H | -2.12788600 | 4.24154700  | -0.12302300 |
| C | -2.98839700 | 2.29242200  | 0.29416400  |
| C | -4.30070600 | 2.79534300  | 0.50858700  |
| H | -4.47068100 | 3.86141500  | 0.38307600  |
| C | -5.32847600 | 1.96954900  | 0.89741200  |
| H | -6.32012000 | 2.37635000  | 1.06801700  |
| C | -5.08271300 | 0.59405500  | 1.11728600  |
| H | -5.87655700 | -0.04579200 | 1.48891900  |
| C | -3.83148000 | 0.06912400  | 0.88024900  |
| H | -3.63958100 | -0.97522100 | 1.09879100  |
| C | -2.76611100 | 0.87924500  | 0.41750100  |
| C | -1.44533900 | 0.35452100  | 0.16285200  |
| C | -0.40642900 | 1.28737700  | 0.05599000  |
| C | -1.02157300 | -0.99697000 | -0.03452600 |
| C | 0.40642900  | -1.28737700 | 0.05599000  |
| C | -1.65954100 | -2.23724700 | -0.36144100 |
| C | -2.98035800 | -2.55815000 | -0.75916900 |
| H | -3.73459900 | -1.78618900 | -0.85632000 |
| C | -3.29763600 | -3.87000800 | -1.06627100 |
| H | -4.30720000 | -4.11679700 | -1.37781100 |
| C | -2.32742400 | -4.88956900 | -0.99249200 |
| H | -2.60735800 | -5.91123900 | -1.22878800 |

|   |             |             |             |
|---|-------------|-------------|-------------|
| C | -1.00734800 | -4.59520800 | -0.65201300 |
| H | -0.25653600 | -5.37972400 | -0.63469200 |
| C | -0.66442300 | -3.28065700 | -0.36033200 |

Molecule 1 at CAM-B3LYP/6-31+G(d, p) level

|   |             |             |             |
|---|-------------|-------------|-------------|
| C | 0.66300600  | -2.67088700 | -0.08577800 |
| C | 1.94591900  | -3.15864900 | 0.00283300  |
| H | 2.16473800  | -4.21547700 | -0.11656600 |
| C | 3.00794800  | -2.26239400 | 0.29867600  |
| C | 4.31979600  | -2.75745700 | 0.52139400  |
| H | 4.49563500  | -3.82243400 | 0.39982500  |
| C | 5.34075000  | -1.92845100 | 0.91268400  |
| H | 6.33313300  | -2.33016100 | 1.09014500  |
| C | 5.08685800  | -0.55604600 | 1.12273000  |
| H | 5.87586900  | 0.09094900  | 1.49202700  |
| C | 3.83633900  | -0.03903400 | 0.87735300  |
| H | 3.64696100  | 1.00542700  | 1.08645800  |
| C | 2.77398700  | -0.85200100 | 0.41662500  |
| C | 1.44943500  | -0.33839400 | 0.15500000  |
| C | 1.00995000  | 1.00698200  | -0.04426500 |
| C | 1.63206500  | 2.25573400  | -0.36849200 |
| C | 2.94745700  | 2.59777800  | -0.75701700 |
| H | 3.71454400  | 1.84020400  | -0.84813700 |
| C | 3.24947600  | 3.91220400  | -1.06098500 |
| H | 4.25800500  | 4.17183400  | -1.36519400 |
| C | 2.26786400  | 4.91647800  | -0.99192200 |
| H | 2.53385000  | 5.94220900  | -1.22592900 |
| C | 0.95364000  | 4.60232200  | -0.65592100 |
| H | 0.19338900  | 5.37703900  | -0.63937400 |
| C | 0.62694600  | 3.28526200  | -0.36723500 |
| C | -0.66300600 | 2.67088700  | -0.08577900 |
| C | -1.94591900 | 3.15864900  | 0.00283300  |
| H | -2.16473700 | 4.21547600  | -0.11656700 |
| C | -3.00794800 | 2.26239400  | 0.29867600  |
| C | -4.31979600 | 2.75745700  | 0.52139400  |
| H | -4.49563400 | 3.82243400  | 0.39982500  |
| C | -5.34075100 | 1.92845100  | 0.91268400  |
| H | -6.33313300 | 2.33016100  | 1.09014500  |
| C | -5.08685800 | 0.55604600  | 1.12273000  |
| H | -5.87587000 | -0.09094900 | 1.49202600  |
| C | -3.83633900 | 0.03903500  | 0.87735300  |
| H | -3.64696200 | -1.00542700 | 1.08645700  |
| C | -2.77398700 | 0.85200100  | 0.41662500  |

|   |             |             |             |
|---|-------------|-------------|-------------|
| C | -1.44943500 | 0.33839400  | 0.15500000  |
| C | -0.42105100 | 1.28052000  | 0.04544600  |
| C | -1.00995000 | -1.00698200 | -0.04426500 |
| C | 0.42105100  | -1.28052000 | 0.04544500  |
| C | -1.63206500 | -2.25573400 | -0.36849100 |
| C | -2.94745700 | -2.59777900 | -0.75701700 |
| H | -3.71454400 | -1.84020500 | -0.84813700 |
| C | -3.24947600 | -3.91220400 | -1.06098500 |
| H | -4.25800400 | -4.17183500 | -1.36519500 |
| C | -2.26786400 | -4.91647800 | -0.99192200 |
| H | -2.53384900 | -5.94220900 | -1.22593000 |
| C | -0.95364000 | -4.60232200 | -0.65592100 |
| H | -0.19338800 | -5.37703900 | -0.63937500 |
| C | -0.62694600 | -3.28526200 | -0.36723400 |

Molecule 2 at B3LYP/6-31+G(d, p) level

|    |             |             |             |
|----|-------------|-------------|-------------|
| Si | 8.07822500  | -0.14479500 | 0.47551100  |
| Si | -8.07751500 | 0.14714600  | 0.47616900  |
| C  | 8.28084100  | -1.25630400 | 1.98968000  |
| H  | 7.77455000  | -2.21725400 | 1.84664500  |
| C  | 8.78158600  | -0.99215600 | -1.06007000 |
| H  | 8.65660200  | -0.36480200 | -1.94934000 |
| C  | 8.92290200  | 1.52083600  | 0.75594600  |
| H  | 9.99822300  | 1.37932000  | 0.91667900  |
| C  | 6.27417400  | 0.15718400  | 0.20925100  |
| C  | 5.07523900  | 0.35575000  | 0.03366900  |
| C  | 3.69549700  | 0.60914700  | -0.17019500 |
| C  | 3.24598500  | 1.94626100  | -0.50784300 |
| C  | 4.18241900  | 2.98458700  | -0.74973000 |
| H  | 5.23714300  | 2.77244600  | -0.61137700 |
| C  | 3.78224800  | 4.23386100  | -1.18775700 |
| H  | 4.52464800  | 5.00361400  | -1.37706900 |
| C  | 2.41784900  | 4.49282700  | -1.42679000 |
| H  | 2.10374500  | 5.45091700  | -1.82942700 |
| C  | 1.47696100  | 3.51212300  | -1.15970800 |
| H  | 0.43564000  | 3.70475700  | -1.38483100 |
| C  | 1.84505900  | 2.24406200  | -0.65284200 |
| C  | 0.86281100  | 1.20784200  | -0.37338000 |
| C  | 1.35533600  | -0.10295600 | -0.25366400 |
| C  | 0.54435900  | -1.31831400 | -0.17078800 |
| C  | 1.45510000  | -2.37699700 | 0.16590000  |
| C  | 1.24747300  | -3.72372200 | 0.55156800  |
| H  | 0.24746900  | -4.13332100 | 0.61508900  |

|   |             |             |             |
|---|-------------|-------------|-------------|
| C | 2.33548300  | -4.51747700 | 0.88483000  |
| H | 2.17661400  | -5.54775100 | 1.18726100  |
| C | 3.64688100  | -3.99693500 | 0.84292900  |
| H | 4.48451200  | -4.63997300 | 1.09634500  |
| C | 3.88239200  | -2.66070600 | 0.50862000  |
| H | 4.89062900  | -2.26495000 | 0.51503100  |
| C | 2.80054200  | -1.83585300 | 0.19140300  |
| C | 2.73102400  | -0.41069200 | -0.09685500 |
| C | -0.54452900 | 1.31724100  | -0.17081800 |
| C | -1.45548100 | 2.37591800  | 0.16549600  |
| C | -1.24823300 | 3.72276500  | 0.55091100  |
| H | -0.24832300 | 4.13253300  | 0.61481300  |
| C | -2.33657800 | 4.51646500  | 0.88331700  |
| H | -2.17797600 | 5.54686700  | 1.18546200  |
| C | -3.64792500 | 3.99584300  | 0.84069700  |
| H | -4.48582900 | 4.63890900  | 1.09310000  |
| C | -3.88313100 | 2.65942900  | 0.50677400  |
| H | -4.89150900 | 2.26403800  | 0.51223100  |
| C | -2.80090600 | 1.83468300  | 0.19055600  |
| C | -2.73110800 | 0.40951500  | -0.09732700 |
| C | -3.69566700 | -0.61013200 | -0.17128800 |
| C | -3.24617000 | -1.94734200 | -0.50862400 |
| C | -4.18252000 | -2.98556200 | -0.75118900 |
| H | -5.23731600 | -2.77327100 | -0.61363500 |
| C | -3.78225300 | -4.23480300 | -1.18917200 |
| H | -4.52462300 | -5.00444700 | -1.37905100 |
| C | -2.41775600 | -4.49383900 | -1.42759400 |
| H | -2.10354100 | -5.45190200 | -1.83020900 |
| C | -1.47693600 | -3.51320000 | -1.16007300 |
| H | -0.43554800 | -3.70586800 | -1.38485400 |
| C | -1.84517000 | -2.24511200 | -0.65335400 |
| C | -0.86294500 | -1.20893700 | -0.37361900 |
| C | -1.35542300 | 0.10184000  | -0.25384400 |
| C | -5.07519500 | -0.35618900 | 0.03316500  |
| C | -6.27391900 | -0.15629300 | 0.20857200  |
| C | -9.00222400 | -0.29038000 | -1.11227800 |
| H | -8.65930100 | 0.32458200  | -1.95144500 |
| C | -8.66452900 | -0.94540000 | 1.90129900  |
| H | -8.12461500 | -0.71272000 | 2.82558000  |
| C | -8.31575400 | 1.97237900  | 0.89960600  |
| H | -9.37772200 | 2.18771100  | 1.06695100  |
| H | 8.79434800  | 2.18055000  | -0.10915600 |
| H | 8.51286200  | 2.02935600  | 1.63528000  |
| H | 9.85274400  | -1.18789800 | -0.93023900 |



|   |              |             |             |
|---|--------------|-------------|-------------|
| H | 8.28250700   | -1.94915200 | -1.24773900 |
| H | 7.86424500   | -0.78353700 | 2.88570800  |
| H | 9.34269900   | -1.45791300 | 2.17451500  |
| H | -7.96485900  | 2.61722300  | 0.08642900  |
| H | -7.76908900  | 2.24279400  | 1.80966000  |
| H | -8.85308600  | -1.34229800 | -1.37946600 |
| H | -10.07837200 | -0.12234100 | -0.98534900 |
| H | -9.73448500  | -0.79040500 | 2.08463800  |
| H | -8.50976700  | -2.00624600 | 1.67591500  |

Molecule 2 at PBE0/6-31+G(d, p) level

|    |             |             |             |
|----|-------------|-------------|-------------|
| Si | 8.05387300  | -0.12849600 | 0.46332100  |
| Si | -8.04730000 | 0.16132100  | 0.46512200  |
| C  | 8.24730900  | -1.25492400 | 1.95725900  |
| H  | 7.73794300  | -2.21147000 | 1.79931500  |
| C  | 8.74960900  | -0.95361100 | -1.07753800 |
| H  | 8.62344300  | -0.31451800 | -1.95761800 |
| C  | 8.89055300  | 1.52839400  | 0.76304000  |
| H  | 9.96553100  | 1.38634900  | 0.92224100  |
| C  | 6.25212600  | 0.17713300  | 0.20053800  |
| C  | 5.05335100  | 0.37458700  | 0.02898600  |
| C  | 3.67506200  | 0.62123900  | -0.17024700 |
| C  | 3.22012600  | 1.95126600  | -0.50101200 |
| C  | 4.14979800  | 2.99140100  | -0.73602500 |
| H  | 5.20611300  | 2.78084000  | -0.59781700 |
| C  | 3.74336400  | 4.23727400  | -1.16557900 |
| H  | 4.48132500  | 5.01259900  | -1.35065900 |
| C  | 2.38080400  | 4.48919200  | -1.40396600 |
| H  | 2.06218300  | 5.44748400  | -1.80320200 |
| C  | 1.44748900  | 3.50519000  | -1.14347800 |
| H  | 0.40361700  | 3.68996300  | -1.37009600 |
| C  | 1.82370700  | 2.24093000  | -0.64405600 |
| C  | 0.85173700  | 1.20252000  | -0.37143700 |
| C  | 1.34842000  | -0.10235000 | -0.25402100 |
| C  | 0.54836300  | -1.31787400 | -0.16816900 |
| C  | 1.46239600  | -2.36745400 | 0.16719400  |
| C  | 1.26105900  | -3.70987300 | 0.55657900  |
| H  | 0.26157400  | -4.12306200 | 0.62579100  |
| C  | 2.35182000  | -4.49402900 | 0.88810000  |
| H  | 2.19961600  | -5.52427600 | 1.19494600  |
| C  | 3.65664600  | -3.96801600 | 0.84165200  |
| H  | 4.49815600  | -4.60644900 | 1.09527900  |
| C  | 3.88450100  | -2.63495500 | 0.50526200  |

|   |             |             |             |
|---|-------------|-------------|-------------|
| H | 4.89070100  | -2.23088700 | 0.50894300  |
| C | 2.79894000  | -1.82126500 | 0.18922500  |
| C | 2.72132800  | -0.40138600 | -0.09909200 |
| C | -0.55118200 | 1.30295000  | -0.16976600 |
| C | -1.46560200 | 2.35288100  | 0.16373400  |
| C | -1.26484800 | 3.69590300  | 0.55133700  |
| H | -0.26549400 | 4.10933000  | 0.62099400  |
| C | -2.35609100 | 4.48048600  | 0.88037600  |
| H | -2.20428400 | 5.51124400  | 1.18571500  |
| C | -3.66086200 | 3.95440000  | 0.83302300  |
| H | -4.50285600 | 4.59320600  | 1.08419000  |
| C | -3.88830000 | 2.62074200  | 0.49864500  |
| H | -4.89476300 | 2.21724700  | 0.50133500  |
| C | -2.80216700 | 1.80662000  | 0.18539500  |
| C | -2.72399600 | 0.38637300  | -0.10077500 |
| C | -3.67771100 | -0.63628900 | -0.17136800 |
| C | -3.22286000 | -1.96659200 | -0.50049800 |
| C | -4.15258400 | -3.00659700 | -0.73558900 |
| H | -5.20896300 | -2.79548400 | -0.59876100 |
| C | -3.74610700 | -4.25287500 | -1.16386500 |
| H | -4.48406300 | -5.02815700 | -1.34912800 |
| C | -2.38338000 | -4.50523900 | -1.40092500 |
| H | -2.06465800 | -5.46392000 | -1.79914300 |
| C | -1.45003200 | -3.52120300 | -1.14064600 |
| H | -0.40605600 | -3.70640200 | -1.36645600 |
| C | -1.82634700 | -2.25639900 | -0.64266400 |
| C | -0.85445200 | -1.21772800 | -0.37060300 |
| C | -1.35108100 | 0.08727100  | -0.25469100 |
| C | -5.05534500 | -0.38687200 | 0.02832200  |
| C | -6.25243400 | -0.18043700 | 0.20079800  |
| C | -8.97531400 | -0.27982100 | -1.11026600 |
| H | -8.61848700 | 0.31482800  | -1.95757600 |
| C | -8.64896100 | -0.89250000 | 1.90199900  |
| H | -8.10069700 | -0.65688200 | 2.81999900  |
| C | -8.23457600 | 1.99115500  | 0.85777500  |
| H | -9.28979300 | 2.23682000  | 1.02292600  |
| H | 8.76006900  | 2.19659800  | -0.09464600 |
| H | 8.47822500  | 2.02400600  | 1.64805100  |
| H | 9.82021900  | -1.15152600 | -0.95066100 |
| H | 8.24862300  | -1.90716000 | -1.27467600 |
| H | 7.83005700  | -0.79125700 | 2.85712100  |
| H | 9.30782700  | -1.46195400 | 2.14090000  |
| H | -7.86774300 | 2.61157600  | 0.03320500  |
| H | -7.67891800 | 2.25955700  | 1.76254200  |

|   |              |             |             |
|---|--------------|-------------|-------------|
| H | -8.84746200  | -1.33854400 | -1.35900300 |
| H | -10.04703700 | -0.08700700 | -0.98555900 |
| H | -9.71430300  | -0.71114300 | 2.08501600  |
| H | -8.51732500  | -1.95881800 | 1.69050600  |

Molecule 2 at BMK/6-31+G(d, p) level

|    |             |             |             |
|----|-------------|-------------|-------------|
| Si | 8.08403300  | -0.12524200 | 0.45221100  |
| Si | -8.07697400 | 0.16699100  | 0.45146700  |
| C  | 8.31815700  | -1.01844100 | 2.08607500  |
| H  | 7.80528100  | -1.98926400 | 2.08352700  |
| C  | 8.72955900  | -1.16822400 | -0.96848300 |
| H  | 8.57646900  | -0.66161600 | -1.93050700 |
| C  | 8.93004900  | 1.54910800  | 0.48364000  |
| H  | 10.01151900 | 1.42436900  | 0.63455300  |
| C  | 6.28062200  | 0.15494300  | 0.19716700  |
| C  | 5.08349300  | 0.35461400  | 0.02741200  |
| C  | 3.69487300  | 0.61186000  | -0.17125100 |
| C  | 3.24360200  | 1.95327900  | -0.50005900 |
| C  | 4.18238900  | 2.99838400  | -0.73652600 |
| H  | 5.24034200  | 2.78614100  | -0.60258300 |
| C  | 3.77461600  | 4.25135100  | -1.16117100 |
| H  | 4.51451400  | 5.02732600  | -1.34678400 |
| C  | 2.40185700  | 4.50992600  | -1.39471300 |
| H  | 2.08485200  | 5.47262000  | -1.78975800 |
| C  | 1.46255400  | 3.52435900  | -1.13450800 |
| H  | 0.41698400  | 3.71109500  | -1.35762700 |
| C  | 1.84071500  | 2.24847200  | -0.63827600 |
| C  | 0.86042300  | 1.20550700  | -0.36515200 |
| C  | 1.35614700  | -0.10712000 | -0.24754700 |
| C  | 0.54755500  | -1.33132200 | -0.16253800 |
| C  | 1.46656100  | -2.38885100 | 0.17216400  |
| C  | 1.26457100  | -3.74026000 | 0.56152900  |
| H  | 0.26387500  | -4.15438400 | 0.63289500  |
| C  | 2.36191200  | -4.52935000 | 0.89036500  |
| H  | 2.20879200  | -5.56213600 | 1.19524200  |
| C  | 3.67484300  | -4.00213800 | 0.84213200  |
| H  | 4.51796400  | -4.64272400 | 1.09306700  |
| C  | 3.90304300  | -2.66085000 | 0.50590200  |
| H  | 4.91060200  | -2.25457100 | 0.50724400  |
| C  | 2.81106000  | -1.84395500 | 0.19240500  |
| C  | 2.73616000  | -0.41085200 | -0.09600300 |
| C  | -0.55097000 | 1.31187900  | -0.16408500 |
| C  | -1.46976400 | 2.36995800  | 0.16980400  |

|   |              |             |             |
|---|--------------|-------------|-------------|
| C | -1.26690800  | 3.72168400  | 0.55723100  |
| H | -0.26599700  | 4.13559600  | 0.62699700  |
| C | -2.36373300  | 4.51151100  | 0.88605300  |
| H | -2.21006500  | 5.54465600  | 1.18945600  |
| C | -3.67680600  | 3.98471100  | 0.83947100  |
| H | -4.51935300  | 4.62598700  | 1.09019300  |
| C | -3.90602900  | 2.64303500  | 0.50506200  |
| H | -4.91439700  | 2.23784600  | 0.50764800  |
| C | -2.81443600  | 1.82533800  | 0.19152500  |
| C | -2.73934400  | 0.39178200  | -0.09500500 |
| C | -3.69827500  | -0.63068900 | -0.16953600 |
| C | -3.24753300  | -1.97273100 | -0.49567400 |
| C | -4.18673300  | -3.01784300 | -0.73026700 |
| H | -5.24457600  | -2.80468900 | -0.59695600 |
| C | -3.77947000  | -4.27173500 | -1.15255300 |
| H | -4.51961500  | -5.04780800 | -1.33673300 |
| C | -2.40676700  | -4.53119300 | -1.38561600 |
| H | -2.09015700  | -5.49474400 | -1.77887100 |
| C | -1.46705600  | -3.54547700 | -1.12751100 |
| H | -0.42162700  | -3.73299400 | -1.35054600 |
| C | -1.84467900  | -2.26848600 | -0.63361100 |
| C | -0.86406800  | -1.22522900 | -0.36274300 |
| C | -1.35952700  | 0.08762500  | -0.24661800 |
| C | -5.08620200  | -0.36921200 | 0.02749000  |
| C | -6.28152800  | -0.15876200 | 0.19627400  |
| C | -8.98682700  | -0.26637200 | -1.13181900 |
| H | -8.62658700  | 0.34092000  | -1.97261800 |
| C | -8.67563900  | -0.90404200 | 1.87148200  |
| H | -8.13204100  | -0.67180500 | 2.79672700  |
| C | -8.28208700  | 1.98678700  | 0.85940900  |
| H | -9.34355400  | 2.22198800  | 1.02042500  |
| H | 8.77743200   | 2.08652900  | -0.46165600 |
| H | 8.54110400   | 2.17226200  | 1.29973800  |
| H | 9.80636200   | -1.35130400 | -0.84539600 |
| H | 8.22029100   | -2.14016700 | -1.00862400 |
| H | 7.92221200   | -0.42435600 | 2.92021400  |
| H | 9.38681500   | -1.19778500 | 2.27023900  |
| H | -7.91424700  | 2.61927900  | 0.04057100  |
| H | -7.73291100  | 2.25084300  | 1.77292200  |
| H | -8.84782700  | -1.32467000 | -1.38938000 |
| H | -10.06392500 | -0.08236000 | -1.01308900 |
| H | -9.74636200  | -0.73262800 | 2.05106800  |
| H | -8.53326100  | -1.96981100 | 1.64893100  |

Molecule 2 at M062X/6-31+G(d, p) level

|    |             |             |             |
|----|-------------|-------------|-------------|
| Si | -8.03773700 | 0.08001600  | 0.45878300  |
| Si | 8.01076400  | -0.19752500 | 0.46522300  |
| C  | -8.19326300 | 1.18434500  | 1.96893100  |
| H  | -7.66524800 | 2.13080800  | 1.81655600  |
| C  | -8.71015600 | 0.94594000  | -1.06484500 |
| H  | -8.59914900 | 0.31763200  | -1.95341600 |
| C  | -8.89771900 | -1.56482300 | 0.73215000  |
| H  | -9.96942400 | -1.40873700 | 0.89300100  |
| C  | -6.23563700 | -0.25427500 | 0.18598100  |
| C  | -5.04097800 | -0.45019100 | 0.01695300  |
| C  | -3.65018700 | -0.68117800 | -0.17987300 |
| C  | -3.17105300 | -2.00484100 | -0.49786900 |
| C  | -4.08185900 | -3.06850300 | -0.72148500 |
| H  | -5.14223400 | -2.87995800 | -0.58498600 |
| C  | -3.64626000 | -4.30722800 | -1.13566600 |
| H  | -4.36431500 | -5.10173200 | -1.31194200 |
| C  | -2.27428100 | -4.53164500 | -1.37358200 |
| H  | -1.93719200 | -5.48613800 | -1.76425600 |
| C  | -1.36344100 | -3.52700600 | -1.12668400 |
| H  | -0.31568900 | -3.68548600 | -1.35509400 |
| C  | -1.77138500 | -2.26519600 | -0.63738700 |
| C  | -0.82197100 | -1.20383100 | -0.37454300 |
| C  | -1.34494600 | 0.09071600  | -0.26020300 |
| C  | -0.57248600 | 1.32900500  | -0.17105500 |
| C  | -1.51282900 | 2.35786200  | 0.16452700  |
| C  | -1.34086100 | 3.70301900  | 0.56389100  |
| H  | -0.35080500 | 4.13557600  | 0.64542400  |
| C  | -2.45142300 | 4.46112700  | 0.89186500  |
| H  | -2.32320500 | 5.49164400  | 1.20569600  |
| C  | -3.74528700 | 3.90873400  | 0.83394600  |
| H  | -4.60086600 | 4.52771000  | 1.08506700  |
| C  | -3.94254000 | 2.57171300  | 0.49092600  |
| H  | -4.93943600 | 2.14591900  | 0.48701000  |
| C  | -2.83615300 | 1.78547300  | 0.17859500  |
| C  | -2.72511400 | 0.35962600  | -0.11000600 |
| C  | 0.58373100  | -1.27622200 | -0.17736200 |
| C  | 1.52513700  | -2.30642500 | 0.15157700  |
| C  | 1.35543300  | -3.65381100 | 0.54470100  |
| H  | 0.36597500  | -4.08763600 | 0.62676300  |

|   |             |             |             |
|---|-------------|-------------|-------------|
| C | 2.46747200  | -4.41295600 | 0.86559000  |
| H | 2.34058400  | -5.44519100 | 1.17429800  |
| C | 3.76098500  | -3.85957500 | 0.80679900  |
| H | 4.61831500  | -4.47890500 | 1.05174200  |
| C | 3.95608900  | -2.52070200 | 0.47044300  |
| H | 4.95254800  | -2.09430800 | 0.46583000  |
| C | 2.84828500  | -1.73351800 | 0.16525500  |
| C | 2.73597100  | -0.30660600 | -0.11648200 |
| C | 3.66125100  | 0.73430400  | -0.18414300 |
| C | 3.18212900  | 2.05881600  | -0.49599800 |
| C | 4.09318200  | 3.12233100  | -0.71824200 |
| H | 5.15365200  | 2.93191300  | -0.58561900 |
| C | 3.65750500  | 4.36281900  | -1.12692000 |
| H | 4.37557900  | 5.15746200  | -1.30245300 |
| C | 2.28498800  | 4.58890000  | -1.36040400 |
| H | 1.94755500  | 5.54505700  | -1.74668900 |
| C | 1.37396400  | 3.58396400  | -1.11514100 |
| H | 0.32582200  | 3.74414200  | -1.34061100 |
| C | 1.78211500  | 2.31998800  | -0.63164700 |
| C | 0.83282700  | 1.25770200  | -0.37116100 |
| C | 1.35573500  | -0.03737700 | -0.26292200 |
| C | 5.05040300  | 0.49312600  | 0.01130000  |
| C | 6.23901100  | 0.26517900  | 0.18293700  |
| C | 8.98395300  | 0.19010200  | -1.09160700 |
| H | 8.59267700  | -0.36889500 | -1.94664800 |
| C | 8.66062200  | 0.79252300  | 1.92051100  |
| H | 8.08049900  | 0.58518800  | 2.82444900  |
| C | 8.04332300  | -2.03824900 | 0.83677700  |
| H | 9.07103500  | -2.36996000 | 1.01769300  |
| H | -8.77387700 | -2.21850100 | -0.13650400 |
| H | -8.49054200 | -2.07696100 | 1.60891700  |
| H | -9.77393100 | 1.16977000  | -0.93287800 |
| H | -8.18147100 | 1.88743200  | -1.24222600 |
| H | -7.77497000 | 0.69705500  | 2.85451700  |
| H | -9.24666500 | 1.40947200  | 2.16573000  |
| H | 7.64296300  | -2.61413300 | -0.00361300 |
| H | 7.44955600  | -2.26786400 | 1.72722400  |
| H | 8.93468500  | 1.25739000  | -1.32705200 |
| H | 10.03581100 | -0.08221600 | -0.95552100 |
| H | 9.70617800  | 0.53252500  | 2.11615300  |
| H | 8.60751500  | 1.86612500  | 1.71678300  |



Molecule 2 at CAM-B3LYP/6-31+G(d, p) level

|    |             |             |             |
|----|-------------|-------------|-------------|
| Si | 8.04957800  | -0.12349700 | 0.43634900  |
| Si | -8.04281600 | 0.15973600  | 0.43645600  |
| C  | 8.25050900  | -1.22494300 | 1.94385700  |
| H  | 7.73817100  | -2.18194800 | 1.80569400  |
| C  | 8.73010100  | -0.97217600 | -1.09443800 |
| H  | 8.59973900  | -0.34720100 | -1.98295500 |
| C  | 8.89140300  | 1.53267500  | 0.70472600  |
| H  | 9.96641900  | 1.39269400  | 0.85908900  |
| C  | 6.24524900  | 0.18255100  | 0.18186800  |
| C  | 5.05358300  | 0.38118000  | 0.01862500  |
| C  | 3.66620600  | 0.62932500  | -0.17222000 |
| C  | 3.20979400  | 1.95855300  | -0.49787100 |
| C  | 4.13856200  | 3.00057500  | -0.73804800 |
| H  | 5.19444500  | 2.79170300  | -0.60887000 |
| C  | 3.72996500  | 4.24340800  | -1.15876100 |
| H  | 4.46461500  | 5.01938800  | -1.34803800 |
| C  | 2.36385400  | 4.49579900  | -1.38311300 |
| H  | 2.04272700  | 5.45523400  | -1.77490600 |
| C  | 1.43583600  | 3.51470400  | -1.11960100 |
| H  | 0.39234600  | 3.70165500  | -1.33551100 |
| C  | 1.81606100  | 2.24630700  | -0.62856300 |
| C  | 0.84748800  | 1.20580900  | -0.35328700 |
| C  | 1.34736400  | -0.09550900 | -0.23714800 |
| C  | 0.55215200  | -1.31816500 | -0.14908700 |
| C  | 1.47355400  | -2.36331300 | 0.18447000  |
| C  | 1.28101800  | -3.70562000 | 0.57452500  |
| H  | 0.28616000  | -4.12412500 | 0.64879800  |
| C  | 2.37518300  | -4.48494500 | 0.90009300  |
| H  | 2.22721300  | -5.51505500 | 1.20631600  |
| C  | 3.67555500  | -3.95624700 | 0.84800100  |
| H  | 4.52044800  | -4.58985900 | 1.09774600  |
| C  | 3.89334900  | -2.62381000 | 0.50963800  |
| H  | 4.89632200  | -2.21634800 | 0.50768400  |
| C  | 2.80442400  | -1.81693900 | 0.19912000  |
| C  | 2.72107000  | -0.39001800 | -0.09073200 |
| C  | -0.55505900 | 1.30163000  | -0.15014900 |
| C  | -1.47650100 | 2.34715300  | 0.18234500  |
| C  | -1.28404800 | 3.69001800  | 0.57050500  |
| H  | -0.28920600 | 4.10865600  | 0.64425000  |

|   |              |             |             |
|---|--------------|-------------|-------------|
| C | -2.37831200  | 4.46979500  | 0.89475100  |
| H | -2.23037200  | 5.50037300  | 1.19942100  |
| C | -3.67870100  | 3.94108400  | 0.84303800  |
| H | -4.52375500  | 4.57509200  | 1.09127500  |
| C | -3.89653100  | 2.60810100  | 0.50677300  |
| H | -4.89983700  | 2.20141500  | 0.50482600  |
| C | -2.80740600  | 1.80074500  | 0.19782200  |
| C | -2.72376500  | 0.37348000  | -0.09006200 |
| C | -3.66901700  | -0.64581700 | -0.17064900 |
| C | -3.21299400  | -1.97539600 | -0.49470400 |
| C | -4.14204000  | -3.01730700 | -0.73403100 |
| H | -5.19787500  | -2.80780600 | -0.60547200 |
| C | -3.73377800  | -4.26065000 | -1.15349900 |
| H | -4.46859400  | -5.03660900 | -1.34220900 |
| C | -2.36769200  | -4.51357500 | -1.37751000 |
| H | -2.04680200  | -5.47348000 | -1.76834900 |
| C | -1.43940100  | -3.53243300 | -1.11509600 |
| H | -0.39599800  | -3.71989200 | -1.33098600 |
| C | -1.81927000  | -2.26338600 | -0.62545100 |
| C | -0.85049600  | -1.22262500 | -0.35165600 |
| C | -1.35019700  | 0.07883900  | -0.23653500 |
| C | -5.05567700  | -0.39440100 | 0.02027800  |
| C | -6.24558800  | -0.18595200 | 0.18378500  |
| C | -8.95726700  | -0.26779200 | -1.14675400 |
| H | -8.59163600  | 0.32940200  | -1.98741300 |
| C | -8.65662200  | -0.89919000 | 1.86017300  |
| H | -8.11423600  | -0.67241700 | 2.78288300  |
| C | -8.22855400  | 1.98451400  | 0.83842900  |
| H | -9.28299600  | 2.23415400  | 0.99624400  |
| H | 8.75729800   | 2.18874200  | -0.16065000 |
| H | 8.48711000   | 2.04332000  | 1.58383700  |
| H | 9.80013400   | -1.17251300 | -0.97497100 |
| H | 8.22549500   | -1.92615500 | -1.27481600 |
| H | 7.84066600   | -0.74763000 | 2.83895800  |
| H | 9.31024800   | -1.43276900 | 2.12552000  |
| H | -7.85300600  | 2.60961900  | 0.02253100  |
| H | -7.68050300  | 2.24668800  | 1.74858300  |
| H | -8.83167100  | -1.32439300 | -1.40184100 |
| H | -10.02877700 | -0.07249900 | -1.03278700 |
| H | -9.72149300  | -0.71689900 | 2.03935700  |
| H | -8.52765100  | -1.96408900 | 1.64434100  |

Molecule 3 at B3LYP/6-31+G(d, p) level

|    |             |             |             |
|----|-------------|-------------|-------------|
| Si | 8.09009600  | 0.71657700  | 0.38767800  |
| C  | 8.81570700  | 1.71335000  | -1.04804400 |
| H  | 8.61279800  | 1.24049700  | -2.01450600 |
| H  | 9.90111200  | 1.81979400  | -0.94064100 |
| H  | 8.38042200  | 2.71858600  | -1.06781900 |
| C  | 8.45053200  | 1.60800000  | 2.01765000  |
| H  | 7.98893700  | 1.09851200  | 2.86962400  |
| H  | 8.05659300  | 2.62979300  | 1.98350000  |
| H  | 9.52954000  | 1.66995500  | 2.20008400  |
| C  | 8.77319600  | -1.08221700 | 0.40680300  |
| C  | 10.31626300 | -1.04287900 | 0.49575200  |
| H  | 10.71631700 | -2.06627600 | 0.52232000  |
| H  | 10.66503500 | -0.53397500 | 1.40182800  |
| H  | 10.76575900 | -0.53998800 | -0.36791600 |
| C  | 8.36504500  | -1.82239500 | -0.88549400 |
| H  | 8.76017300  | -2.84817600 | -0.87412700 |
| H  | 8.75991000  | -1.33049500 | -1.78180800 |
| H  | 7.27682900  | -1.88809900 | -0.99303600 |
| C  | 8.22253700  | -1.84914800 | 1.62875300  |
| H  | 8.59625300  | -2.88293700 | 1.62601600  |
| H  | 7.12785500  | -1.89500600 | 1.62648200  |
| H  | 8.53438900  | -1.39142000 | 2.57419700  |
| C  | 6.25404800  | 0.67646000  | 0.15834200  |
| C  | 5.03900500  | 0.73940700  | -0.01013800 |
| C  | 3.64246500  | 0.87847900  | -0.21542300 |
| C  | 3.09465800  | 2.17960600  | -0.55379500 |
| C  | 3.95050800  | 3.28539700  | -0.79579900 |
| H  | 5.01793400  | 3.15339100  | -0.65712300 |
| C  | 3.45863500  | 4.50111400  | -1.23501800 |
| H  | 4.14199500  | 5.32376200  | -1.42423800 |
| C  | 2.07919200  | 4.65774900  | -1.47568300 |
| H  | 1.69483500  | 5.58937200  | -1.87946700 |
| C  | 1.21424800  | 3.60958900  | -1.20851700 |
| H  | 0.16165200  | 3.72330900  | -1.43476700 |
| C  | 1.67562100  | 2.37301700  | -0.70025500 |
| C  | 0.77209900  | 1.26780400  | -0.42073500 |
| C  | -0.63949100 | 1.27404300  | -0.21841900 |
| C  | -1.62502900 | 2.26363400  | 0.11720900  |
| C  | -1.51761400 | 3.62241400  | 0.50174300  |
| H  | -0.55064200 | 4.10482100  | 0.56560100  |
| C  | -2.66155300 | 4.33422400  | 0.83294500  |
| H  | -2.57933300 | 5.37369600  | 1.13438100  |
| C  | 1.35978200  | -0.00279300 | -0.30074100 |
| C  | 2.75461900  | -0.20886200 | -0.14401300 |

|    |              |             |             |
|----|--------------|-------------|-------------|
| C  | 2.92684400   | -1.62535500 | 0.14202600  |
| C  | 4.06625500   | -2.36877200 | 0.45583800  |
| H  | 5.04178700   | -1.89882400 | 0.45901800  |
| C  | 3.93122200   | -3.71891100 | 0.78920900  |
| H  | 4.81446300   | -4.29884200 | 1.03975200  |
| Si | -8.09009600  | -0.71657700 | 0.38767700  |
| C  | -8.81570700  | -1.71334800 | -1.04804500 |
| H  | -8.61279700  | -1.24049600 | -2.01450600 |
| H  | -9.90111300  | -1.81979200 | -0.94064200 |
| H  | -8.38042300  | -2.71858500 | -1.06782000 |
| C  | -8.45053200  | -1.60800200 | 2.01764900  |
| H  | -7.98893800  | -1.09851300 | 2.86962300  |
| H  | -8.05659100  | -2.62979300 | 1.98349900  |
| H  | -9.52954000  | -1.66995900 | 2.20008300  |
| C  | -8.77319600  | 1.08221700  | 0.40680400  |
| C  | -10.31626300 | 1.04287900  | 0.49575400  |
| H  | -10.71631700 | 2.06627600  | 0.52232200  |
| H  | -10.66503500 | 0.53397400  | 1.40182900  |
| H  | -10.76576000 | 0.53998800  | -0.36791400 |
| C  | -8.36504500  | 1.82239600  | -0.88549200 |
| H  | -8.76017300  | 2.84817700  | -0.87412500 |
| H  | -8.75991000  | 1.33049700  | -1.78180700 |
| H  | -7.27682900  | 1.88810000  | -0.99303500 |
| C  | -8.22253700  | 1.84914800  | 1.62875400  |
| H  | -8.59625300  | 2.88293600  | 1.62601800  |
| H  | -7.12785500  | 1.89500500  | 1.62648300  |
| H  | -8.53438800  | 1.39141900  | 2.57419800  |
| C  | -6.25404800  | -0.67646000 | 0.15834200  |
| C  | -5.03900500  | -0.73940700 | -0.01013800 |
| C  | -3.64246500  | -0.87847900 | -0.21542400 |
| C  | -3.09465800  | -2.17960600 | -0.55379600 |
| C  | -3.95050800  | -3.28539700 | -0.79580000 |
| H  | -5.01793300  | -3.15339200 | -0.65712400 |
| C  | -3.45863400  | -4.50111400 | -1.23501900 |
| H  | -4.14199400  | -5.32376200 | -1.42423800 |
| C  | -2.07919200  | -4.65774900 | -1.47568300 |
| H  | -1.69483400  | -5.58937200 | -1.87946700 |
| C  | -1.21424700  | -3.60958900 | -1.20851700 |
| H  | -0.16165200  | -3.72330800 | -1.43476700 |
| C  | -1.67562100  | -2.37301700 | -0.70025600 |
| C  | -0.77209900  | -1.26780400 | -0.42073600 |
| C  | 0.63949100   | -1.27404300 | -0.21841900 |
| C  | 1.62502900   | -2.26363400 | 0.11721000  |
| C  | 1.51761400   | -3.62241400 | 0.50174400  |

|   |             |             |             |
|---|-------------|-------------|-------------|
| H | 0.55064100  | -4.10482000 | 0.56560200  |
| C | 2.66155300  | -4.33422400 | 0.83294500  |
| H | 2.57933300  | -5.37369600 | 1.13438200  |
| C | -1.35978200 | 0.00279300  | -0.30074100 |
| C | -2.75461900 | 0.20886200  | -0.14401400 |
| C | -2.92684400 | 1.62535500  | 0.14202400  |
| C | -4.06625500 | 2.36877200  | 0.45583700  |
| H | -5.04178700 | 1.89882400  | 0.45901700  |
| C | -3.93122200 | 3.71891100  | 0.78920800  |
| H | -4.81446300 | 4.29884200  | 1.03975100  |

Molecule 3 at PBE0/6-31+G(d, p) level

|    |              |             |             |
|----|--------------|-------------|-------------|
| Si | -8.06663000  | -0.71543000 | 0.37417900  |
| C  | -8.79056800  | -1.68731600 | -1.06780700 |
| H  | -8.57785200  | -1.20581800 | -2.02754200 |
| H  | -9.87707200  | -1.78342600 | -0.96469500 |
| H  | -8.36469300  | -2.69602800 | -1.09477700 |
| C  | -8.44747400  | -1.60058400 | 1.99256200  |
| H  | -7.97537800  | -1.10330900 | 2.84562000  |
| H  | -8.07747400  | -2.63075400 | 1.95531100  |
| H  | -9.52805100  | -1.63715400 | 2.17106800  |
| C  | -8.71074500  | 1.08505100  | 0.39592700  |
| C  | -10.24473500 | 1.06902100  | 0.46076300  |
| H  | -10.62891700 | 2.09843400  | 0.49092900  |
| H  | -10.61477500 | 0.55736600  | 1.35693400  |
| H  | -10.68810100 | 0.58113400  | -0.41472800 |
| C  | -8.26838300  | 1.81606600  | -0.87765500 |
| H  | -8.64025300  | 2.85054000  | -0.86725500 |
| H  | -8.66035200  | 1.33678200  | -1.78211000 |
| H  | -7.17705100  | 1.85659600  | -0.96804900 |
| C  | -8.16425300  | 1.82130100  | 1.62545600  |
| H  | -8.50938700  | 2.86503500  | 1.62478700  |
| H  | -7.06848100  | 1.83632500  | 1.64325700  |
| H  | -8.50569600  | 1.36411000  | 2.56094600  |
| C  | -6.23120700  | -0.69418800 | 0.15721900  |
| C  | -5.01683000  | -0.75969000 | -0.00898300 |
| C  | -3.62261400  | -0.89368600 | -0.21052100 |
| C  | -3.07100100  | -2.18797500 | -0.54068400 |
| C  | -3.92098500  | -3.29449500 | -0.77473100 |
| H  | -4.98977700  | -3.16304100 | -0.63604400 |
| C  | -3.42421600  | -4.50707200 | -1.20473300 |
| H  | -4.10341100  | -5.33456900 | -1.38895200 |
| C  | -2.04731500  | -4.65802900 | -1.44507000 |

|    |             |             |             |
|----|-------------|-------------|-------------|
| H  | -1.65927500 | -5.59012000 | -1.84487300 |
| C  | -1.18926100 | -3.60755400 | -1.18574100 |
| H  | -0.13489400 | -3.71428300 | -1.41379500 |
| C  | -1.65722500 | -2.37465600 | -0.68560100 |
| C  | -0.76306300 | -1.26846800 | -0.41395000 |
| C  | 0.64348900  | -1.26699500 | -0.21307200 |
| C  | 1.63149100  | -2.24832100 | 0.11913400  |
| C  | 1.53075600  | -3.60301400 | 0.50538700  |
| H  | 0.56473200  | -4.08911500 | 0.57601800  |
| C  | 2.67731800  | -4.30585900 | 0.83142000  |
| H  | 2.60202000  | -5.34531700 | 1.13563400  |
| C  | -1.35353400 | -0.00348800 | -0.29733000 |
| C  | -2.74481500 | 0.19504500  | -0.14334600 |
| C  | -2.92421200 | 1.60620800  | 0.13970900  |
| C  | -4.06696200 | 2.33902300  | 0.44823900  |
| H  | -5.03955100 | 1.86036300  | 0.44692600  |
| C  | -3.94020100 | 3.68598900  | 0.78140200  |
| H  | -4.82764500 | 4.26155600  | 1.02897100  |
| Si | 8.06663000  | 0.71542900  | 0.37417900  |
| C  | 8.79057000  | 1.68731100  | -1.06780900 |
| H  | 8.57785200  | 1.20581200  | -2.02754300 |
| H  | 9.87707400  | 1.78341800  | -0.96469800 |
| H  | 8.36469700  | 2.69602300  | -1.09478000 |
| C  | 8.44747500  | 1.60058600  | 1.99256000  |
| H  | 7.97538000  | 1.10331200  | 2.84562000  |
| H  | 8.07747500  | 2.63075500  | 1.95530800  |
| H  | 9.52805200  | 1.63715600  | 2.17106600  |
| C  | 8.71074300  | -1.08505300 | 0.39593100  |
| C  | 10.24473300 | -1.06902500 | 0.46076400  |
| H  | 10.62891400 | -2.09843800 | 0.49093100  |
| H  | 10.61477500 | -0.55736800 | 1.35693300  |
| H  | 10.68809700 | -0.58114100 | -0.41473000 |
| C  | 8.26837600  | -1.81607200 | -0.87764800 |
| H  | 8.64024600  | -2.85054600 | -0.86724600 |
| H  | 8.66034300  | -1.33679100 | -1.78210500 |
| H  | 7.17704400  | -1.85660100 | -0.96803800 |
| C  | 8.16425300  | -1.82129900 | 1.62546400  |
| H  | 8.50938600  | -2.86503300 | 1.62479700  |
| H  | 7.06848100  | -1.83632200 | 1.64326700  |
| H  | 8.50569900  | -1.36410500 | 2.56095100  |
| C  | 6.23120700  | 0.69418800  | 0.15721800  |
| C  | 5.01683100  | 0.75969100  | -0.00898500 |
| C  | 3.62261500  | 0.89368800  | -0.21052400 |
| C  | 3.07100100  | 2.18797600  | -0.54068700 |

|   |             |             |             |
|---|-------------|-------------|-------------|
| C | 3.92098500  | 3.29449700  | -0.77473400 |
| H | 4.98977700  | 3.16304200  | -0.63604900 |
| C | 3.42421500  | 4.50707400  | -1.20473700 |
| H | 4.10341000  | 5.33457000  | -1.38895600 |
| C | 2.04731400  | 4.65803000  | -1.44507200 |
| H | 1.65927400  | 5.59012100  | -1.84487400 |
| C | 1.18926100  | 3.60755500  | -1.18574200 |
| H | 0.13489300  | 3.71428400  | -1.41379500 |
| C | 1.65722500  | 2.37465800  | -0.68560300 |
| C | 0.76306300  | 1.26846900  | -0.41395100 |
| C | -0.64348900 | 1.26699600  | -0.21307100 |
| C | -1.63149000 | 2.24832200  | 0.11913600  |
| C | -1.53075400 | 3.60301500  | 0.50539000  |
| H | -0.56473000 | 4.08911700  | 0.57601900  |
| C | -2.67731600 | 4.30586000  | 0.83142500  |
| H | -2.60201700 | 5.34531800  | 1.13563900  |
| C | 1.35353500  | 0.00348900  | -0.29733200 |
| C | 2.74481600  | -0.19504300 | -0.14335000 |
| C | 2.92421400  | -1.60620700 | 0.13970500  |
| C | 4.06696400  | -2.33902200 | 0.44823200  |
| H | 5.03955200  | -1.86036200 | 0.44691700  |
| C | 3.94020300  | -3.68598800 | 0.78139500  |
| H | 4.82764700  | -4.26155500 | 1.02896200  |

Molecule 3 at BMK/6-31+G(d, p) level

|    |              |             |             |
|----|--------------|-------------|-------------|
| Si | -8.07665800  | -0.70515900 | 0.29606000  |
| C  | -8.87222900  | -1.26901600 | -1.30953800 |
| H  | -8.59742300  | -0.61386800 | -2.14643500 |
| H  | -9.96749500  | -1.27273200 | -1.21952200 |
| H  | -8.54974500  | -2.28915400 | -1.55721600 |
| C  | -8.50506500  | -1.89879400 | 1.68170400  |
| H  | -8.02361800  | -1.60985000 | 2.62503100  |
| H  | -8.17174200  | -2.91390400 | 1.42792300  |
| H  | -9.59147100  | -1.92974900 | 1.84441200  |
| C  | -8.59394100  | 1.06838300  | 0.73275700  |
| C  | -10.12878900 | 1.11578200  | 0.95304500  |
| H  | -10.43739500 | 2.14357800  | 1.20065300  |
| H  | -10.44110700 | 0.46620800  | 1.78230500  |
| H  | -10.67955200 | 0.81169900  | 0.05219900  |
| C  | -8.22495300  | 2.03543600  | -0.42004200 |
| H  | -8.51317900  | 3.06437700  | -0.15316400 |
| H  | -8.74649900  | 1.77358300  | -1.35075400 |
| H  | -7.14535800  | 2.03030100  | -0.62528700 |

|    |             |             |             |
|----|-------------|-------------|-------------|
| C  | -7.88880400 | 1.53153000  | 2.03219300  |
| H  | -8.19108400 | 2.56226700  | 2.27564200  |
| H  | -6.79497800 | 1.51640900  | 1.92841300  |
| H  | -8.15561100 | 0.89495700  | 2.88691600  |
| C  | -6.24777200 | -0.74075500 | 0.06420300  |
| C  | -5.03517100 | -0.81838500 | -0.09690800 |
| C  | -3.62770900 | -0.94849000 | -0.29059500 |
| C  | -3.05754700 | -2.24538300 | -0.61462600 |
| C  | -3.89881300 | -3.37104300 | -0.84784400 |
| H  | -4.97137000 | -3.25289200 | -0.71473500 |
| C  | -3.38060900 | -4.58412100 | -1.26781900 |
| H  | -4.04803300 | -5.42386100 | -1.45042300 |
| C  | -1.99012500 | -4.71962700 | -1.50023600 |
| H  | -1.58794500 | -5.65145000 | -1.89170900 |
| C  | -1.14293700 | -3.65306500 | -1.24319700 |
| H  | -0.08482900 | -3.74635000 | -1.46563600 |
| C  | -1.63374300 | -2.41451500 | -0.75103200 |
| C  | -0.75017200 | -1.28777400 | -0.48017300 |
| C  | 0.66509100  | -1.26712900 | -0.27958900 |
| C  | 1.67492200  | -2.23847500 | 0.05494200  |
| C  | 1.59591500  | -3.60158000 | 0.44785000  |
| H  | 0.63655500  | -4.10337200 | 0.52331400  |
| C  | 2.76010100  | -4.28848900 | 0.77662700  |
| H  | 2.70037900  | -5.32986700 | 1.08471800  |
| C  | -1.36095100 | -0.02456700 | -0.36452300 |
| C  | -2.76306000 | 0.15479900  | -0.21529600 |
| C  | -2.96509900 | 1.57529700  | 0.07169800  |
| C  | -4.12555300 | 2.29115600  | 0.38365300  |
| H  | -5.09221200 | 1.79561500  | 0.38044900  |
| C  | -4.02069300 | 3.64633100  | 0.72356700  |
| H  | -4.91899300 | 4.20741500  | 0.97312500  |
| Si | 8.07665800  | 0.70515900  | 0.29606100  |
| C  | 8.87222600  | 1.26902000  | -1.30953700 |
| H  | 8.59741400  | 0.61387700  | -2.14643600 |
| H  | 9.96749200  | 1.27273100  | -1.21952400 |
| H  | 8.54974600  | 2.28916100  | -1.55720800 |
| C  | 8.50506800  | 1.89879000  | 1.68170800  |
| H  | 8.02362600  | 1.60984100  | 2.62503600  |
| H  | 8.17174000  | 2.91390000  | 1.42793200  |
| H  | 9.59147400  | 1.92974800  | 1.84441000  |
| C  | 8.59394200  | -1.06838500 | 0.73275300  |
| C  | 10.12879000 | -1.11578400 | 0.95303800  |
| H  | 10.43739600 | -2.14358100 | 1.20064400  |
| H  | 10.44111000 | -0.46621200 | 1.78229900  |



|   |             |             |             |
|---|-------------|-------------|-------------|
| H | 10.67955100 | -0.81169800 | 0.05219200  |
| C | 8.22495200  | -2.03543400 | -0.42004800 |
| H | 8.51317900  | -3.06437600 | -0.15317400 |
| H | 8.74649600  | -1.77357800 | -1.35076100 |
| H | 7.14535700  | -2.03029900 | -0.62529200 |
| C | 7.88880700  | -1.53153500 | 2.03218900  |
| H | 8.19108600  | -2.56227400 | 2.27563300  |
| H | 6.79498100  | -1.51641200 | 1.92841200  |
| H | 8.15561700  | -0.89496600 | 2.88691300  |
| C | 6.24777100  | 0.74075500  | 0.06420700  |
| C | 5.03517100  | 0.81838500  | -0.09690600 |
| C | 3.62770900  | 0.94849000  | -0.29059300 |
| C | 3.05754700  | 2.24538300  | -0.61462400 |
| C | 3.89881300  | 3.37104400  | -0.84784100 |
| H | 4.97137000  | 3.25289200  | -0.71473100 |
| C | 3.38060900  | 4.58412200  | -1.26781600 |
| H | 4.04803300  | 5.42386100  | -1.45042000 |
| C | 1.99012500  | 4.71962700  | -1.50023400 |
| H | 1.58794500  | 5.65145100  | -1.89170700 |
| C | 1.14293700  | 3.65306500  | -1.24319600 |
| H | 0.08482900  | 3.74635000  | -1.46563500 |
| C | 1.63374300  | 2.41451500  | -0.75103100 |
| C | 0.75017200  | 1.28777400  | -0.48017200 |
| C | -0.66509100 | 1.26713000  | -0.27958900 |
| C | -1.67492300 | 2.23847500  | 0.05494000  |
| C | -1.59591600 | 3.60158100  | 0.44784700  |
| H | -0.63655500 | 4.10337300  | 0.52331200  |
| C | -2.76010200 | 4.28849000  | 0.77662300  |
| H | -2.70038000 | 5.32986800  | 1.08471300  |
| C | 1.36095100  | 0.02456800  | -0.36452200 |
| C | 2.76306000  | -0.15479900 | -0.21529400 |
| C | 2.96509900  | -1.57529600 | 0.07170100  |
| C | 4.12555300  | -2.29115500 | 0.38365600  |
| H | 5.09221100  | -1.79561500 | 0.38045200  |
| C | 4.02069300  | -3.64633000 | 0.72357200  |
| H | 4.91899300  | -4.20741400 | 0.97313100  |

Molecule 3 at M062X/6-31+G(d, p) level

|    |             |             |             |
|----|-------------|-------------|-------------|
| Si | -8.04509000 | -0.72715000 | 0.38933300  |
| C  | -8.83480400 | -1.70179000 | -1.00966300 |
| H  | -8.64748800 | -1.23453300 | -1.98095500 |
| H  | -9.91744800 | -1.77361000 | -0.86312600 |
| H  | -8.42771900 | -2.71731200 | -1.03648400 |

|   |              |             |             |
|---|--------------|-------------|-------------|
| C | -8.43921100  | -1.52914800 | 2.04240300  |
| H | -7.89333000  | -1.04746700 | 2.85864200  |
| H | -8.15975000  | -2.58699700 | 2.02322900  |
| H | -9.51101500  | -1.46522800 | 2.25788800  |
| C | -8.58416500  | 1.09538900  | 0.35977800  |
| C | -10.11954700 | 1.16485100  | 0.36379400  |
| H | -10.44612400 | 2.21326300  | 0.38707500  |
| H | -10.55059900 | 0.66702400  | 1.24022500  |
| H | -10.54828300 | 0.70542700  | -0.53377800 |
| C | -8.05372300  | 1.78494900  | -0.90519300 |
| H | -8.38018100  | 2.83364700  | -0.92551700 |
| H | -8.42683900  | 1.30481500  | -1.81699900 |
| H | -6.95899500  | 1.77401800  | -0.94660400 |
| C | -8.04295700  | 1.81590200  | 1.60324400  |
| H | -8.29856700  | 2.88345600  | 1.56127200  |
| H | -6.95201000  | 1.73730200  | 1.68097300  |
| H | -8.47215800  | 1.40792300  | 2.52492700  |
| C | -6.20654400  | -0.78581900 | 0.15151600  |
| C | -4.99787000  | -0.86257400 | -0.01772600 |
| C | -3.59292100  | -0.98196500 | -0.21866400 |
| C | -3.01482900  | -2.26675500 | -0.53442700 |
| C | -3.84181800  | -3.39721000 | -0.75589400 |
| H | -4.91344500  | -3.28998300 | -0.62007700 |
| C | -3.31348700  | -4.59998800 | -1.16826400 |
| H | -3.96937200  | -5.44685400 | -1.34316100 |
| C | -1.92875200  | -4.72015500 | -1.40656300 |
| H | -1.52032100  | -5.64696700 | -1.79576100 |
| C | -1.09704200  | -3.64835500 | -1.16244500 |
| H | -0.04052900  | -3.72664200 | -1.39187600 |
| C | -1.59938800  | -2.42038200 | -0.67534700 |
| C | -0.73189500  | -1.28996600 | -0.41638100 |
| C | 0.67498500   | -1.25599800 | -0.21960700 |
| C | 1.69170700   | -2.21183600 | 0.11104800  |
| C | 1.62960100   | -3.56855100 | 0.50446700  |
| H | 0.67816600   | -4.08066100 | 0.58478900  |
| C | 2.79800300   | -4.23687300 | 0.82869200  |
| H | 2.75206000   | -5.27578900 | 1.13753700  |
| C | -1.35109100  | -0.03836400 | -0.30531500 |
| C | -2.74743100  | 0.12473800  | -0.15536600 |
| C | -2.96549500  | 1.53815000  | 0.12682400  |
| C | -4.13040300  | 2.23385400  | 0.43524200  |
| H | -5.08659300  | 1.72438600  | 0.43159100  |
| C | -4.04425500  | 3.58329300  | 0.77295000  |
| H | -4.94827000  | 4.13126400  | 1.02095400  |

|    |             |             |             |
|----|-------------|-------------|-------------|
| Si | 8.04509000  | 0.72715000  | 0.38933200  |
| C  | 8.83480700  | 1.70178500  | -1.00966500 |
| H  | 8.64749200  | 1.23452500  | -1.98095600 |
| H  | 9.91745000  | 1.77360500  | -0.86312700 |
| H  | 8.42772300  | 2.71730800  | -1.03649100 |
| C  | 8.43920900  | 1.52915300  | 2.04240000  |
| H  | 7.89332600  | 1.04747500  | 2.85864000  |
| H  | 8.15974800  | 2.58700300  | 2.02322200  |
| H  | 9.51101200  | 1.46523300  | 2.25788800  |
| C  | 8.58416300  | -1.09538900 | 0.35978400  |
| C  | 10.11954600 | -1.16485200 | 0.36380300  |
| H  | 10.44612200 | -2.21326400 | 0.38708800  |
| H  | 10.55059600 | -0.66702200 | 1.24023200  |
| H  | 10.54828300 | -0.70543100 | -0.53377000 |
| C  | 8.05372300  | -1.78495200 | -0.90518500 |
| H  | 8.38018000  | -2.83365100 | -0.92550600 |
| H  | 8.42684000  | -1.30482200 | -1.81699300 |
| H  | 6.95899500  | -1.77402100 | -0.94659800 |
| C  | 8.04295400  | -1.81589700 | 1.60325200  |
| H  | 8.29856300  | -2.88345100 | 1.56128400  |
| H  | 6.95200600  | -1.73729700 | 1.68097900  |
| H  | 8.47215300  | -1.40791600 | 2.52493400  |
| C  | 6.20654400  | 0.78581900  | 0.15151300  |
| C  | 4.99787000  | 0.86257500  | -0.01773100 |
| C  | 3.59292100  | 0.98196500  | -0.21866800 |
| C  | 3.01482900  | 2.26675500  | -0.53443000 |
| C  | 3.84181800  | 3.39721000  | -0.75589900 |
| H  | 4.91344500  | 3.28998300  | -0.62008200 |
| C  | 3.31348600  | 4.59998800  | -1.16826800 |
| H  | 3.96937200  | 5.44685400  | -1.34316600 |
| C  | 1.92875100  | 4.72015500  | -1.40656700 |
| H  | 1.52032000  | 5.64696700  | -1.79576400 |
| C  | 1.09704200  | 3.64835500  | -1.16244800 |
| H  | 0.04052800  | 3.72664100  | -1.39187800 |
| C  | 1.59938800  | 2.42038200  | -0.67534900 |
| C  | 0.73189500  | 1.28996600  | -0.41638200 |
| C  | -0.67498500 | 1.25599800  | -0.21960600 |
| C  | -1.69170600 | 2.21183600  | 0.11105200  |
| C  | -1.62959900 | 3.56855000  | 0.50447100  |
| H  | -0.67816500 | 4.08066000  | 0.58479300  |
| C  | -2.79800100 | 4.23687200  | 0.82869900  |
| H  | -2.75205800 | 5.27578700  | 1.13754600  |
| C  | 1.35109200  | 0.03836400  | -0.30531700 |
| C  | 2.74743100  | -0.12473800 | -0.15537000 |

|   |            |             |            |
|---|------------|-------------|------------|
| C | 2.96549600 | -1.53815000 | 0.12681900 |
| C | 4.13040400 | -2.23385400 | 0.43523500 |
| H | 5.08659400 | -1.72438600 | 0.43158300 |
| C | 4.04425700 | -3.58329400 | 0.77294100 |
| H | 4.94827200 | -4.13126600 | 1.02094200 |

Molecule 3 at CAM-B3LYP/6-31+G(d, p) level

|    |              |             |             |
|----|--------------|-------------|-------------|
| Si | -8.06096000  | -0.71896400 | 0.35016500  |
| C  | -8.77916100  | -1.69109000 | -1.09047200 |
| H  | -8.56167600  | -1.21397100 | -2.05024300 |
| H  | -9.86533700  | -1.78617100 | -0.99486700 |
| H  | -8.35550000  | -2.69979400 | -1.11383100 |
| C  | -8.44924200  | -1.59838800 | 1.96622500  |
| H  | -7.98105700  | -1.10132000 | 2.82030700  |
| H  | -8.08036000  | -2.62812200 | 1.93372300  |
| H  | -9.52909800  | -1.63469800 | 2.14245700  |
| C  | -8.70179300  | 1.07835500  | 0.36477000  |
| C  | -10.23929400 | 1.06921800  | 0.42332800  |
| H  | -10.61900500 | 2.09872100  | 0.44994200  |
| H  | -10.61467800 | 0.56083900  | 1.31772100  |
| H  | -10.68044000 | 0.58160400  | -0.45194800 |
| C  | -8.25591300  | 1.81271800  | -0.90954500 |
| H  | -8.63193200  | 2.84406200  | -0.90108200 |
| H  | -8.64105800  | 1.33195500  | -1.81473900 |
| H  | -7.16576300  | 1.85850600  | -0.99491300 |
| C  | -8.16218700  | 1.82429900  | 1.59549700  |
| H  | -8.51122800  | 2.86506100  | 1.58852800  |
| H  | -7.06792400  | 1.84442800  | 1.61759700  |
| H  | -8.50494400  | 1.37044300  | 2.53074400  |
| C  | -6.22301100  | -0.70408400 | 0.14187300  |
| C  | -5.01561300  | -0.77243200 | -0.01455300 |
| C  | -3.61190600  | -0.90679600 | -0.20642200 |
| C  | -3.05734900  | -2.19943700 | -0.53132900 |
| C  | -3.90491000  | -3.30895000 | -0.77008400 |
| H  | -4.97326500  | -3.18057900 | -0.64014600 |
| C  | -3.40468800  | -4.51775700 | -1.19109300 |
| H  | -4.07946400  | -5.34661600 | -1.37915100 |
| C  | -2.02404200  | -4.66709500 | -1.41772100 |
| H  | -1.63226900  | -5.59969900 | -1.81000200 |
| C  | -1.17236100  | -3.61873900 | -1.15576200 |
| H  | -0.11813300  | -3.72629500 | -1.37342700 |
| C  | -1.64614100  | -2.38255000 | -0.66413700 |
| C  | -0.75694400  | -1.27328900 | -0.39016900 |

|    |             |             |             |
|----|-------------|-------------|-------------|
| C  | 0.64900100  | -1.26536900 | -0.18836400 |
| C  | 1.64527600  | -2.24030200 | 0.14251500  |
| C  | 1.55505400  | -3.59443800 | 0.52930200  |
| H  | 0.59474800  | -4.08699900 | 0.60420800  |
| C  | 2.70541700  | -4.29040200 | 0.85038500  |
| H  | 2.63567200  | -5.32951700 | 1.15390000  |
| C  | -1.35194000 | -0.01286500 | -0.27464300 |
| C  | -2.74388900 | 0.17918700  | -0.12863200 |
| C  | -2.93139500 | 1.59655200  | 0.15655800  |
| C  | -4.07785000 | 2.32043500  | 0.46091600  |
| H  | -5.04621600 | 1.83744500  | 0.45498200  |
| C  | -3.96273200 | 3.66613300  | 0.79608300  |
| H  | -4.85378400 | 4.23523800  | 1.04077700  |
| Si | 8.06096000  | 0.71896500  | 0.35016100  |
| C  | 8.77916100  | 1.69108000  | -1.09048400 |
| H  | 8.56167300  | 1.21395500  | -2.05025200 |
| H  | 9.86533700  | 1.78616100  | -0.99488100 |
| H  | 8.35550000  | 2.69978400  | -1.11384800 |
| C  | 8.44924400  | 1.59839900  | 1.96621400  |
| H  | 7.98106100  | 1.10133700  | 2.82030000  |
| H  | 8.08036200  | 2.62813200  | 1.93370600  |
| H  | 9.52910000  | 1.63471100  | 2.14244400  |
| C  | 8.70179300  | -1.07835500 | 0.36477700  |
| C  | 10.23929400 | -1.06921900 | 0.42333400  |
| H  | 10.61900400 | -2.09872100 | 0.44995400  |
| H  | 10.61467900 | -0.56083300 | 1.31772300  |
| H  | 10.68043900 | -0.58161100 | -0.45194700 |
| C  | 8.25591100  | -1.81272600 | -0.90953300 |
| H  | 8.63192900  | -2.84407000 | -0.90106200 |
| H  | 8.64105500  | -1.33197000 | -1.81472900 |
| H  | 7.16576000  | -1.85851500 | -0.99489800 |
| C  | 8.16218800  | -1.82429000 | 1.59551000  |
| H  | 8.51122800  | -2.86505200 | 1.58854800  |
| H  | 7.06792500  | -1.84441900 | 1.61761100  |
| H  | 8.50494600  | -1.37042800 | 2.53075300  |
| C  | 6.22301100  | 0.70408300  | 0.14187100  |
| C  | 5.01561300  | 0.77243200  | -0.01455500 |
| C  | 3.61190600  | 0.90679600  | -0.20642400 |
| C  | 3.05734900  | 2.19943700  | -0.53133000 |
| C  | 3.90491000  | 3.30895100  | -0.77008500 |
| H  | 4.97326500  | 3.18057900  | -0.64014700 |
| C  | 3.40468800  | 4.51775800  | -1.19109200 |
| H  | 4.07946300  | 5.34661700  | -1.37915000 |
| C  | 2.02404100  | 4.66709600  | -1.41772000 |

|   |             |             |             |
|---|-------------|-------------|-------------|
| H | 1.63226800  | 5.59970000  | -1.81000000 |
| C | 1.17236000  | 3.61873900  | -1.15576100 |
| H | 0.11813200  | 3.72629500  | -1.37342700 |
| C | 1.64614100  | 2.38255000  | -0.66413800 |
| C | 0.75694400  | 1.27328900  | -0.39016900 |
| C | -0.64900100 | 1.26536900  | -0.18836400 |
| C | -1.64527600 | 2.24030200  | 0.14251700  |
| C | -1.55505300 | 3.59443800  | 0.52930400  |
| H | -0.59474800 | 4.08699800  | 0.60421000  |
| C | -2.70541700 | 4.29040100  | 0.85038900  |
| H | -2.63567100 | 5.32951600  | 1.15390500  |
| C | 1.35194000  | 0.01286500  | -0.27464400 |
| C | 2.74388900  | -0.17918700 | -0.12863300 |
| C | 2.93139500  | -1.59655200 | 0.15655500  |
| C | 4.07785000  | -2.32043600 | 0.46091200  |
| H | 5.04621600  | -1.83744600 | 0.45497800  |
| C | 3.96273200  | -3.66613300 | 0.79607900  |
| H | 4.85378400  | -4.23523900 | 1.04077200  |

Molecule 4 at B3LYP/6-31+G(d, p) level

|    |             |             |             |
|----|-------------|-------------|-------------|
| Si | 8.10416900  | -0.14337900 | 0.28493000  |
| Si | -8.09800000 | 0.06822400  | 0.35618500  |
| C  | 8.33925800  | -1.23097000 | 1.85387900  |
| H  | 8.16920400  | -2.25923000 | 1.50036500  |
| C  | 9.77890600  | -1.16869000 | 2.40875300  |
| H  | 10.53351600 | -1.41067500 | 1.65355100  |
| H  | 10.01360200 | -0.17308800 | 2.80288300  |
| H  | 9.90179500  | -1.88115400 | 3.23493100  |
| C  | 7.31820800  | -0.96687100 | 2.97875700  |
| H  | 6.28664900  | -1.06861500 | 2.62885300  |
| H  | 7.46573000  | -1.67777000 | 3.80272600  |
| H  | 7.42573900  | 0.04050600  | 3.39671800  |
| C  | 8.70356100  | -1.05977700 | -1.29291200 |
| H  | 8.41529600  | -0.38958700 | -2.11643000 |
| C  | 10.23220300 | -1.25209700 | -1.36441300 |
| H  | 10.78080200 | -0.31265300 | -1.23601900 |
| H  | 10.58563100 | -1.95111100 | -0.59749100 |
| H  | 10.52094900 | -1.67034200 | -2.33764100 |
| C  | 7.97760100  | -2.39989700 | -1.52142800 |
| H  | 6.88904300  | -2.28060300 | -1.52933200 |
| H  | 8.26998500  | -2.83851600 | -2.48460300 |
| H  | 8.22927800  | -3.13203000 | -0.74440900 |
| C  | 8.97810200  | 1.55625300  | 0.42752300  |

|   |             |             |             |
|---|-------------|-------------|-------------|
| H | 10.03755900 | 1.32190900  | 0.61220200  |
| C | 8.47510000  | 2.40321700  | 1.61383100  |
| H | 8.60920800  | 1.89664100  | 2.57483200  |
| H | 9.02061700  | 3.35481500  | 1.66586800  |
| H | 7.40988200  | 2.64089800  | 1.51023900  |
| C | 8.90291600  | 2.36800700  | -0.88163800 |
| H | 9.34114000  | 1.83395700  | -1.73109000 |
| H | 7.86536600  | 2.60949600  | -1.14175500 |
| H | 9.44273500  | 3.31837200  | -0.77680500 |
| C | 6.29440200  | 0.16564300  | 0.04667800  |
| C | 5.09636700  | 0.37298800  | -0.12604000 |
| C | 3.71705900  | 0.63463900  | -0.32618900 |
| C | 3.27624100  | 1.97142400  | -0.67702200 |
| C | 4.21951500  | 2.99959500  | -0.93488100 |
| H | 5.27283300  | 2.78005500  | -0.79903500 |
| C | 3.82802500  | 4.24735400  | -1.38459000 |
| H | 4.57607600  | 5.00857700  | -1.58572800 |
| C | 2.46468600  | 4.51526100  | -1.61990900 |
| H | 2.15659700  | 5.47154500  | -2.03139200 |
| C | 1.51720000  | 3.54527900  | -1.33779200 |
| H | 0.47642200  | 3.74389200  | -1.56018000 |
| C | 1.87721900  | 2.27959700  | -0.81914700 |
| C | 0.88775400  | 1.25470300  | -0.52547700 |
| C | 1.37034100  | -0.05848500 | -0.39315900 |
| C | 0.54910900  | -1.26579700 | -0.29625000 |
| C | 1.45164700  | -2.32886900 | 0.04861600  |
| C | 1.23316500  | -3.66965900 | 0.44857400  |
| H | 0.22968900  | -4.06966600 | 0.51858400  |
| C | 2.31492800  | -4.46966000 | 0.78739800  |
| H | 2.14776600  | -5.49531700 | 1.10085500  |
| C | 3.63057400  | -3.96109500 | 0.73668600  |
| H | 4.46343100  | -4.60860600 | 0.99439700  |
| C | 3.87665400  | -2.63051700 | 0.38760300  |
| H | 4.88828600  | -2.24393700 | 0.38628700  |
| C | 2.80162300  | -1.79925600 | 0.06458500  |
| C | 2.74398600  | -0.37622900 | -0.23792300 |
| C | -0.51789400 | 1.37775800  | -0.31950100 |
| C | -1.41829200 | 2.44724700  | 0.00973000  |
| C | -1.19875800 | 3.79591400  | 0.38201500  |
| H | -0.19533000 | 4.19815000  | 0.43848200  |
| C | -2.27927800 | 4.60151900  | 0.71129400  |
| H | -2.11118700 | 5.63329000  | 1.00345300  |
| C | -3.59493500 | 4.09112100  | 0.67858200  |
| H | -4.42683800 | 4.74282000  | 0.92843700  |

|   |              |             |             |
|---|--------------|-------------|-------------|
| C | -3.84107500  | 2.75375500  | 0.35738200  |
| H | -4.85140100  | 2.36461100  | 0.37021100  |
| C | -2.76771800  | 1.91742100  | 0.04437600  |
| C | -2.71277600  | 0.48916300  | -0.23025500 |
| C | -3.68686000  | -0.52276600 | -0.29167600 |
| C | -3.24701000  | -1.86663300 | -0.61951400 |
| C | -4.19027000  | -2.90120700 | -0.85134200 |
| H | -5.24306900  | -2.68144300 | -0.71303000 |
| C | -3.80022600  | -4.15685300 | -1.28005800 |
| H | -4.54895200  | -4.92231700 | -1.46168900 |
| C | -2.43839500  | -4.42804800 | -1.51950400 |
| H | -2.13191800  | -5.39161000 | -1.91487800 |
| C | -1.49049500  | -3.45173400 | -1.26190800 |
| H | -0.45084900  | -3.65318100 | -1.48709700 |
| C | -1.84870100  | -2.17683600 | -0.76512900 |
| C | -0.85759000  | -1.14661800 | -0.49694500 |
| C | -1.33978200  | 0.16870800  | -0.38799400 |
| C | -5.06686800  | -0.26692200 | -0.08399100 |
| C | -6.27074000  | -0.09561500 | 0.09087400  |
| C | -8.93250200  | -0.32538000 | -1.32785300 |
| H | -8.49371100  | 0.42811300  | -1.99973500 |
| C | -8.58045100  | -1.70588700 | -1.91552600 |
| H | -7.49924300  | -1.87572100 | -1.94664800 |
| H | -9.03110800  | -2.51851300 | -1.33535100 |
| H | -8.95928500  | -1.79254100 | -2.94250000 |
| C | -10.45982600 | -0.10700600 | -1.32984300 |
| H | -10.74319200 | 0.88614300  | -0.96470600 |
| H | -10.85917700 | -0.20781600 | -2.34760200 |
| H | -10.97288100 | -0.84857200 | -0.70721400 |
| C | -8.53274100  | -1.08365500 | 1.82998600  |
| H | -7.88780600  | -0.70193400 | 2.63622600  |
| C | -8.15836000  | -2.56416400 | 1.62211800  |
| H | -7.11899400  | -2.68467800 | 1.29947600  |
| H | -8.28206900  | -3.12534400 | 2.55778000  |
| H | -8.79980500  | -3.04068400 | 0.87268400  |
| C | -9.99278900  | -0.95502500 | 2.31181800  |
| H | -10.27570300 | 0.08168200  | 2.52379600  |
| H | -10.69779400 | -1.34659200 | 1.56991400  |
| H | -10.14254300 | -1.53028900 | 3.23494200  |
| C | -8.48790300  | 1.88145600  | 0.84188500  |
| H | -9.57634300  | 1.90764800  | 1.00347000  |
| C | -8.16637200  | 2.88829000  | -0.28088500 |
| H | -8.71919100  | 2.67475300  | -1.20158500 |
| H | -8.42778400  | 3.90857200  | 0.02930600  |



|   |             |            |             |
|---|-------------|------------|-------------|
| H | -7.09872600 | 2.88628300 | -0.53026600 |
| C | -7.81724600 | 2.30497000 | 2.16428400  |
| H | -8.11230600 | 1.66623000 | 3.00330600  |
| H | -6.72404900 | 2.26743200 | 2.09060700  |
| H | -8.09292100 | 3.33554100 | 2.42400500  |

Molecule 4 at PBE0/6-31+G(d, p) level

|    |             |             |             |
|----|-------------|-------------|-------------|
| Si | 8.08067700  | -0.14840600 | 0.27242300  |
| Si | -8.07267500 | 0.06880400  | 0.34478800  |
| C  | 8.31563700  | -1.19709600 | 1.85484600  |
| H  | 8.19536100  | -2.23810300 | 1.51707100  |
| C  | 9.73045700  | -1.05790600 | 2.43199600  |
| H  | 10.51156200 | -1.27542400 | 1.69620100  |
| H  | 9.90900200  | -0.04515800 | 2.81181200  |
| H  | 9.87110200  | -1.74817500 | 3.27375200  |
| C  | 7.26363300  | -0.94511200 | 2.93965500  |
| H  | 6.24596200  | -1.10077600 | 2.56875600  |
| H  | 7.42039300  | -1.62180800 | 3.78995600  |
| H  | 7.31742300  | 0.07919300  | 3.32584400  |
| C  | 8.66765500  | -1.09557800 | -1.27694700 |
| H  | 8.41716900  | -0.42875700 | -2.11582300 |
| C  | 10.18107600 | -1.33458600 | -1.29962200 |
| H  | 10.75498300 | -0.41027100 | -1.16960800 |
| H  | 10.48743900 | -2.03072300 | -0.50998200 |
| H  | 10.48698400 | -1.77957200 | -2.25530200 |
| C  | 7.90561000  | -2.40687100 | -1.48800500 |
| H  | 6.82227000  | -2.24985900 | -1.52553700 |
| H  | 8.20516800  | -2.88173800 | -2.43131300 |
| H  | 8.11278300  | -3.12630200 | -0.68631900 |
| C  | 8.94507300  | 1.54640100  | 0.38090900  |
| H  | 10.00219600 | 1.32658200  | 0.59626000  |
| C  | 8.40050900  | 2.41256900  | 1.52132700  |
| H  | 8.51251200  | 1.93449800  | 2.49988400  |
| H  | 8.92924000  | 3.37385400  | 1.56297700  |
| H  | 7.33501000  | 2.62924600  | 1.37955100  |
| C  | 8.88254500  | 2.30452000  | -0.94911300 |
| H  | 9.35768200  | 1.75320900  | -1.76726500 |
| H  | 7.84527200  | 2.50567300  | -1.24382600 |
| H  | 9.39173000  | 3.27353200  | -0.86578300 |
| C  | 6.27580700  | 0.16883800  | 0.03466700  |
| C  | 5.07862200  | 0.38190400  | -0.13077800 |
| C  | 3.70180100  | 0.64270400  | -0.32345300 |
| C  | 3.26007200  | 1.97413000  | -0.66623500 |

|   |             |             |             |
|---|-------------|-------------|-------------|
| C | 4.20017700  | 3.00142900  | -0.91576400 |
| H | 5.25441700  | 2.78023300  | -0.77869700 |
| C | 3.80666300  | 4.24724200  | -1.35698900 |
| H | 4.55281900  | 5.01200500  | -1.55288800 |
| C | 2.44607100  | 4.51216400  | -1.59275600 |
| H | 2.13674300  | 5.46971700  | -2.00097700 |
| C | 1.50279600  | 3.54169700  | -1.31800900 |
| H | 0.46017700  | 3.73601700  | -1.54234500 |
| C | 1.86648400  | 2.27849100  | -0.80659300 |
| C | 0.88382800  | 1.25443600  | -0.51935000 |
| C | 1.36635900  | -0.05446800 | -0.38806200 |
| C | 0.55252700  | -1.25963400 | -0.28672100 |
| C | 1.45557500  | -2.31604000 | 0.05734800  |
| C | 1.23988100  | -3.65138200 | 0.46288000  |
| H | 0.23582900  | -4.05201900 | 0.53976700  |
| C | 2.32241900  | -4.44449800 | 0.80038400  |
| H | 2.15909900  | -5.46923100 | 1.11972500  |
| C | 3.63299000  | -3.93433400 | 0.74385200  |
| H | 4.46807000  | -4.57927500 | 1.00231000  |
| C | 3.87498800  | -2.60801600 | 0.39086800  |
| H | 4.88594000  | -2.21599400 | 0.38609900  |
| C | 2.79828500  | -1.78535800 | 0.06823100  |
| C | 2.73624900  | -0.36770900 | -0.23549500 |
| C | -0.51703500 | 1.37312300  | -0.31418300 |
| C | -1.41796700 | 2.43713600  | 0.01088300  |
| C | -1.20200100 | 3.78223900  | 0.38308700  |
| H | -0.19823300 | 4.18617800  | 0.44457500  |
| C | -2.28370800 | 4.58182900  | 0.70792000  |
| H | -2.11978900 | 5.61414800  | 1.00146300  |
| C | -3.59416000 | 4.06909400  | 0.67160100  |
| H | -4.42881900 | 4.71880600  | 0.91929400  |
| C | -3.83526000 | 2.73441800  | 0.35216400  |
| H | -4.84433900 | 2.33857700  | 0.36278300  |
| C | -2.75986500 | 1.90587900  | 0.04327700  |
| C | -2.70068600 | 0.48200600  | -0.22724900 |
| C | -3.66723100 | -0.52972500 | -0.28347900 |
| C | -3.22674200 | -1.86860900 | -0.60141600 |
| C | -4.16706900 | -2.90201600 | -0.82405000 |
| H | -5.22089100 | -2.67931400 | -0.68701900 |
| C | -3.77517400 | -4.15671400 | -1.24107400 |
| H | -4.52218100 | -4.92556200 | -1.41672400 |
| C | -2.41597800 | -4.42618200 | -1.47894300 |
| H | -2.10833400 | -5.39209000 | -1.86829800 |
| C | -1.47213100 | -3.44918800 | -1.23074400 |

|   |              |             |             |
|---|--------------|-------------|-------------|
| H | -0.43060800  | -3.64722200 | -1.45702500 |
| C | -1.83388700  | -2.17556400 | -0.74452400 |
| C | -0.84948500  | -1.14556400 | -0.48606800 |
| C | -1.33154600  | 0.16580800  | -0.38246700 |
| C | -5.04455500  | -0.27559300 | -0.08032800 |
| C | -6.24738800  | -0.09932900 | 0.09076900  |
| C | -8.88684000  | -0.31107100 | -1.33911300 |
| H | -8.48926900  | 0.48598000  | -1.98680300 |
| C | -8.46947600  | -1.64557000 | -1.96350600 |
| H | -7.38068800  | -1.75504100 | -2.00621200 |
| H | -8.86994400  | -2.49696200 | -1.40292500 |
| H | -8.85198600  | -1.72474900 | -2.98946200 |
| C | -10.41285300 | -0.16996200 | -1.31442500 |
| H | -10.73983500 | 0.79226600  | -0.90475800 |
| H | -10.82314200 | -0.25051800 | -2.32935000 |
| H | -10.87769200 | -0.96143200 | -0.71569000 |
| C | -8.51074400  | -1.08619400 | 1.80066400  |
| H | -7.80942200  | -0.76474400 | 2.58664700  |
| C | -8.23702300  | -2.56802100 | 1.52820200  |
| H | -7.22715100  | -2.73717500 | 1.13901500  |
| H | -8.33925000  | -3.15425300 | 2.45063500  |
| H | -8.94903000  | -2.97942900 | 0.80430500  |
| C | -9.93178200  | -0.88394100 | 2.33871900  |
| H | -10.13552400 | 0.15882200  | 2.60479100  |
| H | -10.68800000 | -1.19361300 | 1.60876900  |
| H | -10.08836100 | -1.48839500 | 3.24159600  |
| C | -8.44659000  | 1.87139000  | 0.83917600  |
| H | -9.53338700  | 1.90738300  | 1.01279000  |
| C | -8.12151700  | 2.86910400  | -0.27681400 |
| H | -8.70003200  | 2.67754100  | -1.18657300 |
| H | -8.34513900  | 3.89489500  | 0.04395300  |
| H | -7.05980700  | 2.83667400  | -0.54959600 |
| C | -7.75267700  | 2.26475700  | 2.14745700  |
| H | -8.04491700  | 1.62068500  | 2.98364500  |
| H | -6.66158300  | 2.20659700  | 2.05486100  |
| H | -8.00353900  | 3.29694100  | 2.42443400  |

Molecule 4 at BMK/6-31+G(d, p) level

|    |             |             |            |
|----|-------------|-------------|------------|
| Si | 8.10114800  | -0.14727000 | 0.25611300 |
| Si | -8.08853900 | 0.10049600  | 0.31927700 |
| C  | 8.38260700  | -0.99919600 | 1.93123100 |
| H  | 8.27459500  | -2.07951700 | 1.73650600 |
| C  | 9.82028100  | -0.76180400 | 2.46469700 |

|   |             |             |             |
|---|-------------|-------------|-------------|
| H | 10.59098900 | -1.03977400 | 1.73420300  |
| H | 9.97162600  | 0.29531600  | 2.72427000  |
| H | 9.99173200  | -1.35364800 | 3.37531900  |
| C | 7.34508400  | -0.62033400 | 3.01706100  |
| H | 6.32106200  | -0.84520400 | 2.69560800  |
| H | 7.54489200  | -1.17475900 | 3.94574000  |
| H | 7.39123900  | 0.45170800  | 3.25397400  |
| C | 8.63779600  | -1.25717800 | -1.18284500 |
| H | 8.38044200  | -0.69485800 | -2.09541900 |
| C | 10.16545800 | -1.51461000 | -1.19725400 |
| H | 10.74387900 | -0.58059900 | -1.17889700 |
| H | 10.46969900 | -2.11900600 | -0.33094200 |
| H | 10.45353900 | -2.07008300 | -2.10149100 |
| C | 7.86350500  | -2.59627900 | -1.22599000 |
| H | 6.77790900  | -2.43518900 | -1.26672600 |
| H | 8.15128800  | -3.18062900 | -2.11212600 |
| H | 8.08456700  | -3.21032700 | -0.34132000 |
| C | 8.97676200  | 1.52815300  | 0.15341000  |
| H | 10.04005500 | 1.33568900  | 0.37527600  |
| C | 8.44710400  | 2.53856200  | 1.20056100  |
| H | 8.56630200  | 2.17074500  | 2.22792200  |
| H | 8.98604500  | 3.49398200  | 1.12160400  |
| H | 7.37869700  | 2.74107400  | 1.03886100  |
| C | 8.88970000  | 2.13584700  | -1.26819600 |
| H | 9.35667000  | 1.48892400  | -2.02221100 |
| H | 7.84162600  | 2.29388400  | -1.56187800 |
| H | 9.39630200  | 3.11139800  | -1.30160700 |
| C | 6.29799500  | 0.16433200  | 0.03592000  |
| C | 5.10273100  | 0.37989100  | -0.12671800 |
| C | 3.71414200  | 0.64276900  | -0.31546900 |
| C | 3.26612000  | 1.97996300  | -0.66363900 |
| C | 4.20735400  | 3.01718900  | -0.92372900 |
| H | 5.26579600  | 2.80256400  | -0.79371400 |
| C | 3.80197400  | 4.26483900  | -1.36557800 |
| H | 4.54368800  | 5.03458700  | -1.56876700 |
| C | 2.42854300  | 4.52535400  | -1.59333600 |
| H | 2.11275200  | 5.48303100  | -2.00131700 |
| C | 1.48707100  | 3.54802000  | -1.31105000 |
| H | 0.44078300  | 3.73531100  | -1.53016100 |
| C | 1.86352100  | 2.27850100  | -0.79747200 |
| C | 0.88104800  | 1.24356500  | -0.50315400 |
| C | 1.37285300  | -0.06871700 | -0.36528300 |
| C | 0.56079300  | -1.28874500 | -0.25810500 |
| C | 1.47749800  | -2.34342200 | 0.09199100  |

|   |              |             |             |
|---|--------------|-------------|-------------|
| C | 1.27106800   | -3.68639700 | 0.50664700  |
| H | 0.26887500   | -4.09529100 | 0.58692700  |
| C | 2.36585600   | -4.47317500 | 0.84956300  |
| H | 2.20934300   | -5.49942500 | 1.17412200  |
| C | 3.68027500   | -3.95134200 | 0.79108700  |
| H | 4.52135100   | -4.58938500 | 1.05468000  |
| C | 3.91302600   | -2.61756900 | 0.42856400  |
| H | 4.92266200   | -2.21526400 | 0.42345200  |
| C | 2.82386400   | -1.80285400 | 0.09910400  |
| C | 2.75226400   | -0.37469400 | -0.21503400 |
| C | -0.52914400  | 1.35779000  | -0.29888100 |
| C | -1.44417400  | 2.42372600  | 0.02074800  |
| C | -1.23851500  | 3.78117600  | 0.38665400  |
| H | -0.23682300  | 4.19481800  | 0.44680800  |
| C | -2.33311500  | 4.57782000  | 0.70694200  |
| H | -2.17669900  | 5.61522200  | 0.99391700  |
| C | -3.64734200  | 4.05250600  | 0.67310800  |
| H | -4.48891300  | 4.69779400  | 0.91690100  |
| C | -3.87799300  | 2.70645300  | 0.35949600  |
| H | -4.88595100  | 2.30039900  | 0.37128300  |
| C | -2.78943100  | 1.88240100  | 0.05468200  |
| C | -2.72006900  | 0.44500100  | -0.20968100 |
| C | -3.68331700  | -0.57441800 | -0.26802000 |
| C | -3.23721000  | -1.92258300 | -0.57619400 |
| C | -4.17971500  | -2.96803700 | -0.79607300 |
| H | -5.23731400  | -2.74956800 | -0.66682100 |
| C | -3.77693800  | -4.22952800 | -1.19936000 |
| H | -4.51996700  | -5.00536000 | -1.37245200 |
| C | -2.40512100  | -4.49755600 | -1.42759200 |
| H | -2.09180900  | -5.46814500 | -1.80586600 |
| C | -1.46215100  | -3.51122200 | -1.18429100 |
| H | -0.41734700  | -3.70577300 | -1.40424300 |
| C | -1.83534700  | -2.22545500 | -0.71012700 |
| C | -0.85067300  | -1.18157400 | -0.45676900 |
| C | -1.34166100  | 0.13449000  | -0.35971200 |
| C | -5.07161000  | -0.31159200 | -0.07335400 |
| C | -6.27135700  | -0.11973700 | 0.08882600  |
| C | -8.90895200  | -0.30255700 | -1.34165000 |
| H | -8.62224200  | 0.53788100  | -1.99559300 |
| C | -8.39661100  | -1.59719200 | -2.01911300 |
| H | -7.30424600  | -1.59169300 | -2.12410500 |
| H | -8.67748900  | -2.48819900 | -1.44262200 |
| H | -8.83491100  | -1.70038200 | -3.02258100 |
| C | -10.45595300 | -0.31585600 | -1.24574000 |

|   |              |             |             |
|---|--------------|-------------|-------------|
| H | -10.85275700 | 0.59523300  | -0.77692500 |
| H | -10.90223300 | -0.39928900 | -2.24722500 |
| H | -10.80324500 | -1.17715200 | -0.65805500 |
| C | -8.59354000  | -1.01498500 | 1.76848300  |
| H | -7.83257100  | -0.81770900 | 2.54210700  |
| C | -8.53117400  | -2.52464700 | 1.43106700  |
| H | -7.56590000  | -2.80678600 | 0.98926400  |
| H | -8.67737300  | -3.12828900 | 2.33851600  |
| H | -9.32308300  | -2.79928200 | 0.72051300  |
| C | -9.97524900  | -0.65585800 | 2.37263600  |
| H | -10.02552100 | 0.39179500  | 2.69638300  |
| H | -10.78418800 | -0.82337300 | 1.64874400  |
| H | -10.18106100 | -1.28693300 | 3.24950800  |
| C | -8.39741900  | 1.91111400  | 0.78026200  |
| H | -9.48426700  | 2.00760000  | 0.94354100  |
| C | -8.00211600  | 2.89481600  | -0.34786200 |
| H | -8.58063200  | 2.72380800  | -1.26451800 |
| H | -8.17520500  | 3.93364800  | -0.03137600 |
| H | -6.93653300  | 2.79640800  | -0.60170300 |
| C | -7.68430800  | 2.29062800  | 2.10229900  |
| H | -7.99548200  | 1.65103500  | 2.93877500  |
| H | -6.59376600  | 2.19428900  | 1.99855500  |
| H | -7.90394300  | 3.33282900  | 2.37531700  |

Molecule 4 at M062X/6-31+G(d, p) level

|    |             |             |             |
|----|-------------|-------------|-------------|
| Si | 8.03840500  | -0.17776300 | 0.30156000  |
| Si | -8.03749400 | 0.05065300  | 0.37114800  |
| C  | 8.14612400  | -1.19534700 | 1.90780900  |
| H  | 8.05718300  | -2.24751900 | 1.59745900  |
| C  | 9.51444900  | -1.02074600 | 2.58740200  |
| H  | 10.35040700 | -1.22828300 | 1.91139500  |
| H  | 9.63908400  | 0.00211900  | 2.96105800  |
| H  | 9.60502700  | -1.69587600 | 3.44630600  |
| C  | 7.01303800  | -0.90457000 | 2.90176500  |
| H  | 6.02873900  | -1.10878800 | 2.47035700  |
| H  | 7.12564700  | -1.52041800 | 3.80219400  |
| H  | 7.01921100  | 0.14520300  | 3.21716300  |
| C  | 8.60634400  | -1.21063200 | -1.18266000 |
| H  | 8.55493500  | -0.54446700 | -2.05542300 |
| C  | 10.05890800 | -1.67816400 | -1.01246900 |
| H  | 10.74555300 | -0.84465100 | -0.82471000 |
| H  | 10.14691900 | -2.38053400 | -0.17459800 |
| H  | 10.40700200 | -2.20017800 | -1.91140900 |

|   |             |             |             |
|---|-------------|-------------|-------------|
| C | 7.67649300  | -2.40240500 | -1.44506500 |
| H | 6.65009600  | -2.07824200 | -1.64470100 |
| H | 8.02169100  | -2.97986200 | -2.31093300 |
| H | 7.65252600  | -3.08665900 | -0.58766300 |
| C | 9.00167600  | 1.44959200  | 0.42025100  |
| H | 10.02569400 | 1.18970700  | 0.72658400  |
| C | 8.40193000  | 2.38283000  | 1.48165000  |
| H | 8.38966200  | 1.92810000  | 2.47748900  |
| H | 8.97705900  | 3.31401100  | 1.54828100  |
| H | 7.36883000  | 2.64674000  | 1.22542800  |
| C | 9.06939900  | 2.15701700  | -0.94013400 |
| H | 9.59677900  | 1.55955200  | -1.69048600 |
| H | 8.06259500  | 2.36445600  | -1.32417000 |
| H | 9.59184100  | 3.11695300  | -0.85103900 |
| C | 6.26406000  | 0.26344700  | 0.00115500  |
| C | 5.07872200  | 0.50216600  | -0.17787900 |
| C | 3.69299900  | 0.75580000  | -0.37672500 |
| C | 3.23040300  | 2.08243000  | -0.70234600 |
| C | 4.15496600  | 3.13190700  | -0.93635400 |
| H | 5.21345700  | 2.92928700  | -0.80270900 |
| C | 3.73440900  | 4.37336300  | -1.35754100 |
| H | 4.46207700  | 5.15715300  | -1.54212400 |
| C | 2.36441100  | 4.61399200  | -1.59175400 |
| H | 2.03856300  | 5.57026100  | -1.98758800 |
| C | 1.44096000  | 3.62328300  | -1.33514700 |
| H | 0.39469400  | 3.79442400  | -1.56123900 |
| C | 1.83368500  | 2.35936700  | -0.83895000 |
| C | 0.87184700  | 1.31180200  | -0.56495400 |
| C | 1.37901200  | 0.01115000  | -0.44200100 |
| C | 0.59227900  | -1.21739200 | -0.33975000 |
| C | 1.52252400  | -2.25539200 | -0.00181500 |
| C | 1.33715800  | -3.59597300 | 0.40654200  |
| H | 0.34259900  | -4.01651000 | 0.49569500  |
| C | 2.44041400  | -4.36565800 | 0.73319300  |
| H | 2.30141600  | -5.39279600 | 1.05340700  |
| C | 3.74022000  | -3.82896300 | 0.66548200  |
| H | 4.59067200  | -4.45596000 | 0.91486000  |
| C | 3.95076500  | -2.49616000 | 0.31408300  |
| H | 4.95329600  | -2.08345200 | 0.30237500  |
| C | 2.85229400  | -1.69856200 | 0.00197400  |
| C | 2.75578400  | -0.27334900 | -0.29579000 |
| C | -0.53137900 | 1.40353900  | -0.36156800 |
| C | -1.45904200 | 2.44829500  | -0.03689400 |
| C | -1.27646300 | 3.79881800  | 0.33992100  |

|   |              |             |             |
|---|--------------|-------------|-------------|
| H | -0.28331700  | 4.22604900  | 0.41127900  |
| C | -2.38041900  | 4.57124500  | 0.65878300  |
| H | -2.24227600  | 5.60571600  | 0.95486900  |
| C | -3.67954900  | 4.02940200  | 0.61348000  |
| H | -4.53121700  | 4.65802300  | 0.85563700  |
| C | -3.88550100  | 2.68873000  | 0.29277200  |
| H | -4.88343900  | 2.26633300  | 0.29546500  |
| C | -2.78687700  | 1.88932600  | -0.00837500 |
| C | -2.69429200  | 0.45906100  | -0.27421400 |
| C | -3.63322200  | -0.57037700 | -0.31793200 |
| C | -3.17323700  | -1.90359800 | -0.62509400 |
| C | -4.09860000  | -2.95890500 | -0.82877700 |
| H | -5.15581700  | -2.75627600 | -0.68632800 |
| C | -3.68144900  | -4.20734900 | -1.23260800 |
| H | -4.41064300  | -4.99485000 | -1.39409900 |
| C | -2.31435100  | -4.45111500 | -1.47913900 |
| H | -1.99203600  | -5.41407900 | -1.86138300 |
| C | -1.38949600  | -3.45467000 | -1.25162600 |
| H | -0.34560400  | -3.62858000 | -1.48662000 |
| C | -1.77791400  | -2.18238600 | -0.77383500 |
| C | -0.81284800  | -1.12997700 | -0.53087200 |
| C | -1.31889500  | 0.17257600  | -0.43021100 |
| C | -5.01911000  | -0.32804900 | -0.09962900 |
| C | -6.21331700  | -0.14399200 | 0.08874500  |
| C | -8.89193500  | -0.41900600 | -1.25699400 |
| H | -8.66775700  | 0.42069900  | -1.93116300 |
| C | -8.33605500  | -1.68981200 | -1.91435300 |
| H | -7.25505600  | -1.62360200 | -2.07153700 |
| H | -8.53226800  | -2.57718200 | -1.30353900 |
| H | -8.80991400  | -1.85284100 | -2.88981200 |
| C | -10.41734100 | -0.50528500 | -1.09990200 |
| H | -10.84060200 | 0.38860500  | -0.62769100 |
| H | -10.90033300 | -0.62542600 | -2.07666600 |
| H | -10.69915900 | -1.37098600 | -0.48941600 |
| C | -8.46861900  | -1.04190300 | 1.86294400  |
| H | -7.68604600  | -0.80803100 | 2.60007500  |
| C | -8.38189100  | -2.54207100 | 1.55261300  |
| H | -7.43029100  | -2.81058200 | 1.08018300  |
| H | -8.47894100  | -3.13287000 | 2.47107100  |
| H | -9.19036000  | -2.85090600 | 0.88009900  |
| C | -9.82594100  | -0.69376200 | 2.49239900  |
| H | -9.88722100  | 0.35770200  | 2.79132500  |
| H | -10.65149600 | -0.89085300 | 1.79987000  |
| H | -9.99881900  | -1.30310200 | 3.38750600  |



|   |             |            |             |
|---|-------------|------------|-------------|
| C | -8.35516200 | 1.86898400 | 0.80357000  |
| H | -9.43328800 | 1.95957000 | 1.00354500  |
| C | -8.00564900 | 2.81232900 | -0.35519500 |
| H | -8.63534200 | 2.63649600 | -1.23270700 |
| H | -8.13822000 | 3.85889700 | -0.05577000 |
| H | -6.96140100 | 2.68878400 | -0.66783900 |
| C | -7.59842300 | 2.26730600 | 2.07926300  |
| H | -7.88550500 | 1.65476700 | 2.94032800  |
| H | -6.51561600 | 2.15582900 | 1.94531900  |
| H | -7.79379700 | 3.31533200 | 2.33537500  |

Molecule 4 at CAM-B3LYP/6-31+G(d, p) level

|    |             |             |             |
|----|-------------|-------------|-------------|
| Si | 8.07622400  | -0.14317200 | 0.24689700  |
| Si | -8.06908500 | 0.06620400  | 0.32140500  |
| C  | 8.31839600  | -1.20705400 | 1.81243800  |
| H  | 8.17112900  | -2.24164700 | 1.47182700  |
| C  | 9.74752000  | -1.10617800 | 2.37072800  |
| H  | 10.51069000 | -1.33355200 | 1.62106000  |
| H  | 9.95466800  | -0.10282100 | 2.75749800  |
| H  | 9.88447900  | -1.80788900 | 3.20169800  |
| C  | 7.29166700  | -0.94774100 | 2.92420900  |
| H  | 6.26520600  | -1.08326800 | 2.57415600  |
| H  | 7.45498300  | -1.63562700 | 3.76244000  |
| H  | 7.37107400  | 0.07010700  | 3.31962400  |
| C  | 8.64752900  | -1.06993500 | -1.31525800 |
| H  | 8.37578700  | -0.40238900 | -2.14458400 |
| C  | 10.16551200 | -1.29424200 | -1.37528900 |
| H  | 10.73229100 | -0.36642200 | -1.24937100 |
| H  | 10.49679500 | -1.99388300 | -0.60054700 |
| H  | 10.45239700 | -1.72597400 | -2.34129400 |
| C  | 7.89879300  | -2.39220900 | -1.52970200 |
| H  | 6.81381100  | -2.25195800 | -1.54137400 |
| H  | 8.18439500  | -2.84739300 | -2.48534300 |
| H  | 8.13433200  | -3.11875300 | -0.74406700 |
| C  | 8.94734200  | 1.54255300  | 0.36787600  |
| H  | 10.00628400 | 1.31715000  | 0.55770300  |
| C  | 8.43518600  | 2.39826600  | 1.53523000  |
| H  | 8.56594800  | 1.90542900  | 2.50262000  |
| H  | 8.97297700  | 3.35282300  | 1.57790000  |
| H  | 7.36992600  | 2.62649000  | 1.42172700  |
| C  | 8.86640700  | 2.33054800  | -0.94755000 |
| H  | 9.31649200  | 1.79079300  | -1.78572700 |
| H  | 7.82701000  | 2.55056700  | -1.21555400 |

|   |             |             |             |
|---|-------------|-------------|-------------|
| H | 9.38931700  | 3.28970800  | -0.85485000 |
| C | 6.26785600  | 0.17800900  | 0.02579200  |
| C | 5.07808600  | 0.39219600  | -0.13096500 |
| C | 3.69179400  | 0.65362600  | -0.31428900 |
| C | 3.24745500  | 1.98405300  | -0.65125900 |
| C | 4.18585900  | 3.01401700  | -0.90577000 |
| H | 5.23985600  | 2.79529400  | -0.77834300 |
| C | 3.78893100  | 4.25694000  | -1.33689000 |
| H | 4.53104600  | 5.02309900  | -1.53672900 |
| C | 2.42453900  | 4.52164600  | -1.55777800 |
| H | 2.11184700  | 5.48059100  | -1.95751300 |
| C | 1.48745700  | 3.55308400  | -1.28063400 |
| H | 0.44507700  | 3.74905500  | -1.49380500 |
| C | 1.85629200  | 2.28542000  | -0.77888400 |
| C | 0.87806300  | 1.25810300  | -0.48978100 |
| C | 1.36500600  | -0.04690900 | -0.36076300 |
| C | 0.55716400  | -1.25998400 | -0.25811200 |
| C | 1.46849000  | -2.31139900 | 0.08384500  |
| C | 1.26254800  | -3.64711800 | 0.48922900  |
| H | 0.26337900  | -4.05390600 | 0.57064500  |
| C | 2.34905300  | -4.43470200 | 0.82078700  |
| H | 2.19078000  | -5.45965700 | 1.13890500  |
| C | 3.65476600  | -3.92061300 | 0.75949700  |
| H | 4.49369500  | -4.56018600 | 1.01412700  |
| C | 3.88574800  | -2.59449100 | 0.40535000  |
| H | 4.89316100  | -2.19843200 | 0.39568000  |
| C | 2.80502600  | -1.77931200 | 0.08825400  |
| C | 2.73605200  | -0.35447800 | -0.21657000 |
| C | -0.52277700 | 1.37064900  | -0.28344500 |
| C | -1.43192300 | 2.42900300  | 0.04150900  |
| C | -1.22571800 | 3.77388500  | 0.41591900  |
| H | -0.22682500 | 4.18405200  | 0.48217000  |
| C | -2.31141600 | 4.56703700  | 0.73675800  |
| H | -2.15261500 | 5.59903100  | 1.03094000  |
| C | -3.61702800 | 4.05015900  | 0.69534700  |
| H | -4.45548300 | 4.69388700  | 0.94093900  |
| C | -3.84716200 | 2.71626600  | 0.37233700  |
| H | -4.85262500 | 2.31618800  | 0.37790100  |
| C | -2.76771700 | 1.89609400  | 0.06680100  |
| C | -2.70160600 | 0.46558200  | -0.20705800 |
| C | -3.65850700 | -0.54390100 | -0.27448600 |
| C | -3.21540400 | -1.88151600 | -0.58720800 |
| C | -4.15397400 | -2.91801700 | -0.81371800 |
| H | -5.20743400 | -2.69864300 | -0.68399500 |

|   |              |             |             |
|---|--------------|-------------|-------------|
| C | -3.75875800  | -4.16914000 | -1.22227600 |
| H | -4.50169700  | -4.93969800 | -1.40106500 |
| C | -2.39591800  | -4.43731100 | -1.44772800 |
| H | -2.08506900  | -5.40392500 | -1.83003200 |
| C | -1.45822700  | -3.46213900 | -1.19730800 |
| H | -0.41709200  | -3.66105400 | -1.41391600 |
| C | -1.82495800  | -2.18486600 | -0.71906000 |
| C | -0.84483500  | -1.15183500 | -0.45806800 |
| C | -1.33129600  | 0.15544800  | -0.35464100 |
| C | -5.04540700  | -0.28848300 | -0.08164100 |
| C | -6.24125500  | -0.11149000 | 0.07892300  |
| C | -8.87364300  | -0.32180100 | -1.36040200 |
| H | -8.42562400  | 0.42873500  | -2.02722900 |
| C | -8.52017600  | -1.69902900 | -1.93773900 |
| H | -7.44064200  | -1.87587000 | -1.94733700 |
| H | -8.98662600  | -2.50666600 | -1.36568300 |
| H | -8.87925200  | -1.78465800 | -2.97013100 |
| C | -10.39367500 | -0.10134200 | -1.37719500 |
| H | -10.67763600 | 0.89163000  | -1.01508600 |
| H | -10.78439800 | -0.20259100 | -2.39650200 |
| H | -10.91218100 | -0.84070900 | -0.75839200 |
| C | -8.52022700  | -1.07243800 | 1.78009100  |
| H | -7.86291000  | -0.71350800 | 2.58494700  |
| C | -8.18761300  | -2.55406900 | 1.55816800  |
| H | -7.15934800  | -2.69882100 | 1.21361300  |
| H | -8.30664700  | -3.11732700 | 2.49123500  |
| H | -8.85546400  | -3.00826100 | 0.81986100  |
| C | -9.96868300  | -0.91089000 | 2.26517800  |
| H | -10.22223000 | 0.12976600  | 2.48893400  |
| H | -10.68445400 | -1.27385400 | 1.52066100  |
| H | -10.13251400 | -1.49187700 | 3.18037700  |
| C | -8.44294200  | 1.86978500  | 0.79605800  |
| H | -9.53048600  | 1.91284800  | 0.95021600  |
| C | -8.09743500  | 2.86299400  | -0.32253600 |
| H | -8.65075800  | 2.65911400  | -1.24380300 |
| H | -8.33701900  | 3.88795800  | -0.01593000 |
| H | -7.03018800  | 2.83700700  | -0.56795000 |
| C | -7.77421500  | 2.28205700  | 2.11527200  |
| H | -8.08465600  | 1.65081300  | 2.95302700  |
| H | -6.68259900  | 2.22310000  | 2.04669400  |
| H | -8.03056600  | 3.31680100  | 2.37124700  |

Molecule 5 at B3LYP/6-31+G(d, p) level

|   |              |             |             |
|---|--------------|-------------|-------------|
| O | -8.10428300  | 0.55515900  | 2.02965900  |
| O | -7.64883600  | -0.91048600 | -2.49233200 |
| C | -9.50385000  | 0.26672800  | 2.00387800  |
| H | -9.87863900  | 0.53166700  | 2.99255900  |
| H | -9.68489300  | -0.79778600 | 1.81686900  |
| H | -10.01736100 | 0.86731700  | 1.24464800  |
| C | -7.36517500  | 0.31354300  | 0.90582600  |
| C | -5.99531100  | 0.61853500  | 1.00398400  |
| H | -5.60927100  | 1.01213300  | 1.93813600  |
| C | -5.15433700  | 0.40060200  | -0.08677700 |
| C | -5.67505900  | -0.11906700 | -1.28931500 |
| H | -5.00869500  | -0.28180600 | -2.12669600 |
| C | -7.03873300  | -0.41074500 | -1.37526600 |
| C | -7.89358900  | -0.20000500 | -0.27848300 |
| H | -8.94272200  | -0.44282600 | -0.38938600 |
| C | -6.85412300  | -1.15310600 | -3.65572300 |
| H | -7.54230400  | -1.53990900 | -4.40739400 |
| H | -6.07519200  | -1.89711700 | -3.45507800 |
| H | -6.39508300  | -0.22772600 | -4.02118400 |
| C | -3.69181900  | 0.69283500  | 0.00447500  |
| C | -3.20592200  | 2.04296200  | 0.03137200  |
| C | -4.10713800  | 3.14778200  | 0.04104000  |
| H | -5.16445600  | 2.95737100  | -0.10281100 |
| C | -3.67459000  | 4.43712100  | 0.27828100  |
| H | -4.39039800  | 5.25384600  | 0.29687600  |
| C | -2.31027200  | 4.68252900  | 0.54670700  |
| H | -1.97484600  | 5.67870600  | 0.81902300  |
| C | -1.39933800  | 3.64427200  | 0.46539200  |
| H | -0.36276800  | 3.83787100  | 0.70578400  |
| C | -1.78952800  | 2.32520700  | 0.12847800  |
| C | -2.75611000  | -0.33788600 | 0.11823000  |
| C | -1.36121500  | -0.06178300 | 0.05472300  |
| C | -0.58813700  | -1.29817500 | 0.17712100  |
| C | -1.54135100  | -2.32005200 | 0.51567800  |
| C | -1.39122400  | -3.63648700 | 1.02328800  |
| H | -0.40874900  | -4.04621300 | 1.21672300  |
| C | -2.51387300  | -4.39662300 | 1.31562500  |
| H | -2.39452500  | -5.40185600 | 1.70773900  |
| C | -3.80911200  | -3.87180500 | 1.12051300  |
| H | -4.67603300  | -4.48725900 | 1.34223600  |
| C | -3.99217400  | -2.55693600 | 0.68395300  |
| H | -4.99332700  | -2.15484400 | 0.58818100  |
| C | -2.87613300  | -1.76274400 | 0.40837400  |
| C | 0.83440500   | -1.24086900 | 0.01940500  |

|   |             |             |             |
|---|-------------|-------------|-------------|
| O | 8.10428200  | -0.55516000 | -2.02966100 |
| O | 7.64883700  | 0.91048800  | 2.49233000  |
| C | 9.50384900  | -0.26672900 | -2.00388100 |
| H | 9.87863700  | -0.53166800 | -2.99256100 |
| H | 9.68489200  | 0.79778600  | -1.81687200 |
| H | 10.01736100 | -0.86731700 | -1.24465100 |
| C | 7.36517400  | -0.31354300 | -0.90582800 |
| C | 5.99531100  | -0.61853600 | -1.00398500 |
| H | 5.60927100  | -1.01213400 | -1.93813600 |
| C | 5.15433700  | -0.40060200 | 0.08677600  |
| C | 5.67506000  | 0.11906800  | 1.28931400  |
| H | 5.00869600  | 0.28180700  | 2.12669600  |
| C | 7.03873400  | 0.41074600  | 1.37526400  |
| C | 7.89358900  | 0.20000500  | 0.27848100  |
| H | 8.94272200  | 0.44282600  | 0.38938300  |
| C | 6.85412400  | 1.15310800  | 3.65572100  |
| H | 7.54230600  | 1.53991200  | 4.40739200  |
| H | 6.07519300  | 1.89711900  | 3.45507600  |
| H | 6.39508500  | 0.22772900  | 4.02118300  |
| C | 3.69181900  | -0.69283500 | -0.00447500 |
| C | 3.20592200  | -2.04296200 | -0.03137200 |
| C | 4.10713800  | -3.14778200 | -0.04104000 |
| H | 5.16445600  | -2.95737100 | 0.10281100  |
| C | 3.67459000  | -4.43712100 | -0.27828000 |
| H | 4.39039800  | -5.25384700 | -0.29687500 |
| C | 2.31027200  | -4.68253000 | -0.54670500 |
| H | 1.97484600  | -5.67870600 | -0.81902100 |
| C | 1.39933800  | -3.64427200 | -0.46539000 |
| H | 0.36276800  | -3.83787100 | -0.70578200 |
| C | 1.78952800  | -2.32520700 | -0.12847700 |
| C | 2.75610900  | 0.33788600  | -0.11822900 |
| C | 1.36121500  | 0.06178300  | -0.05472200 |
| C | 0.58813700  | 1.29817400  | -0.17711900 |
| C | 1.54135000  | 2.32005200  | -0.51567700 |
| C | 1.39122300  | 3.63648700  | -1.02328600 |
| H | 0.40874900  | 4.04621300  | -1.21672100 |
| C | 2.51387200  | 4.39662200  | -1.31562400 |
| H | 2.39452500  | 5.40185600  | -1.70773800 |
| C | 3.80911200  | 3.87180400  | -1.12051300 |
| H | 4.67603300  | 4.48725800  | -1.34223600 |
| C | 3.99217400  | 2.55693600  | -0.68395200 |
| H | 4.99332700  | 2.15484400  | -0.58818100 |
| C | 2.87613300  | 1.76274400  | -0.40837300 |
| C | -0.83440500 | 1.24086800  | -0.01940400 |

Molecule 5 at PBE0/6-31+G(d, p) level

|   |             |             |             |
|---|-------------|-------------|-------------|
| O | 5.16400600  | -3.57568400 | 5.49473700  |
| O | 6.97907900  | 0.53616400  | 3.95415100  |
| C | 6.16194000  | -3.64917100 | 6.49825400  |
| H | 5.96846400  | -4.57162200 | 7.04582500  |
| H | 6.09749100  | -2.79789900 | 7.18584200  |
| H | 7.16523500  | -3.69095300 | 6.05873700  |
| C | 5.17264200  | -2.50669800 | 4.66031800  |
| C | 4.15830900  | -2.48572100 | 3.69085700  |
| H | 3.43650400  | -3.29579500 | 3.66387700  |
| C | 4.08068200  | -1.42554500 | 2.79463000  |
| C | 5.01648500  | -0.37832200 | 2.85033100  |
| H | 4.93761300  | 0.43898100  | 2.14333100  |
| C | 6.02232600  | -0.41577500 | 3.81400800  |
| C | 6.10586700  | -1.47717000 | 4.72754400  |
| H | 6.90314600  | -1.46188400 | 5.46105100  |
| C | 6.95791800  | 1.64046900  | 3.06551800  |
| H | 7.80139900  | 2.26935300  | 3.35073100  |
| H | 6.02818300  | 2.21250300  | 3.16376300  |
| H | 7.08118700  | 1.31621200  | 2.02584600  |
| C | 2.99266800  | -1.36397800 | 1.78417600  |
| C | 2.94581700  | -2.27769800 | 0.68494400  |
| C | 3.90888900  | -3.31474200 | 0.55601000  |
| H | 4.75608700  | -3.32372200 | 1.23399200  |
| C | 3.76477600  | -4.32465100 | -0.36858400 |
| H | 4.50983700  | -5.11283800 | -0.43047000 |
| C | 2.62542600  | -4.36083600 | -1.19631600 |
| H | 2.45995500  | -5.19973400 | -1.86595900 |
| C | 1.71495500  | -3.32557800 | -1.14983500 |
| H | 0.82467600  | -3.37878600 | -1.76446800 |
| C | 1.88028400  | -2.22246400 | -0.28320600 |
| C | 1.95300600  | -0.44693100 | 1.91033700  |
| C | 0.99454200  | -0.29462800 | 0.87624600  |
| C | 0.01873600  | 0.72737300  | 1.23251000  |
| C | 0.28877500  | 1.06153300  | 2.59927200  |
| C | -0.46309800 | 1.76006500  | 3.57314100  |
| H | -1.43631500 | 2.17044500  | 3.33236200  |
| C | 0.02775600  | 1.88395400  | 4.86043800  |
| H | -0.55311700 | 2.41635000  | 5.60756300  |
| C | 1.26447000  | 1.31437000  | 5.21557600  |

|   |             |             |             |
|---|-------------|-------------|-------------|
| H | 1.63760300  | 1.43312800  | 6.22891100  |
| C | 1.99812300  | 0.56459300  | 4.29782500  |
| H | 2.92429900  | 0.08937400  | 4.60189800  |
| C | 1.51168900  | 0.40711800  | 3.00168700  |
| C | -0.96396900 | 1.10462400  | 0.26850000  |
| O | -5.16400600 | 3.57568400  | -5.49473700 |
| O | -6.97907900 | -0.53616400 | -3.95415100 |
| C | -6.16194000 | 3.64917100  | -6.49825400 |
| H | -5.96846400 | 4.57162200  | -7.04582500 |
| H | -6.09749100 | 2.79789900  | -7.18584200 |
| H | -7.16523500 | 3.69095300  | -6.05873700 |
| C | -5.17264200 | 2.50669800  | -4.66031800 |
| C | -4.15830900 | 2.48572100  | -3.69085700 |
| H | -3.43650400 | 3.29579500  | -3.66387700 |
| C | -4.08068200 | 1.42554500  | -2.79463000 |
| C | -5.01648500 | 0.37832200  | -2.85033100 |
| H | -4.93761300 | -0.43898100 | -2.14333100 |
| C | -6.02232600 | 0.41577500  | -3.81400800 |
| C | -6.10586700 | 1.47717000  | -4.72754400 |
| H | -6.90314600 | 1.46188400  | -5.46105100 |
| C | -6.95791800 | -1.64046900 | -3.06551800 |
| H | -7.80139900 | -2.26935300 | -3.35073100 |
| H | -6.02818300 | -2.21250300 | -3.16376300 |
| H | -7.08118700 | -1.31621200 | -2.02584600 |
| C | -2.99266800 | 1.36397800  | -1.78417600 |
| C | -2.94581700 | 2.27769800  | -0.68494400 |
| C | -3.90888900 | 3.31474200  | -0.55601000 |
| H | -4.75608700 | 3.32372200  | -1.23399200 |
| C | -3.76477600 | 4.32465100  | 0.36858400  |
| H | -4.50983700 | 5.11283800  | 0.43047000  |
| C | -2.62542600 | 4.36083600  | 1.19631600  |
| H | -2.45995500 | 5.19973400  | 1.86595900  |
| C | -1.71495500 | 3.32557800  | 1.14983500  |
| H | -0.82467600 | 3.37878600  | 1.76446800  |
| C | -1.88028400 | 2.22246400  | 0.28320600  |
| C | -1.95300600 | 0.44693100  | -1.91033700 |
| C | -0.99454200 | 0.29462800  | -0.87624600 |
| C | -0.01873600 | -0.72737300 | -1.23251000 |
| C | -0.28877500 | -1.06153300 | -2.59927200 |
| C | 0.46309800  | -1.76006500 | -3.57314100 |
| H | 1.43631500  | -2.17044500 | -3.33236200 |
| C | -0.02775600 | -1.88395400 | -4.86043800 |
| H | 0.55311700  | -2.41635000 | -5.60756300 |
| C | -1.26447000 | -1.31437000 | -5.21557600 |

|   |             |             |             |
|---|-------------|-------------|-------------|
| H | -1.63760300 | -1.43312800 | -6.22891100 |
| C | -1.99812300 | -0.56459300 | -4.29782500 |
| H | -2.92429900 | -0.08937400 | -4.60189800 |
| C | -1.51168900 | -0.40711800 | -3.00168700 |
| C | 0.96396900  | -1.10462400 | -0.26850000 |

Molecule 5 at BMK/6-31+G(d, p) level

|   |              |             |             |
|---|--------------|-------------|-------------|
| O | -8.09245600  | -0.63038200 | -2.00769300 |
| O | -7.63600000  | 0.98853000  | 2.44110300  |
| C | -9.47215900  | -0.31553100 | -2.00301100 |
| H | -9.85227200  | -0.60522000 | -2.98518500 |
| H | -9.62980100  | 0.76098400  | -1.85053500 |
| H | -10.00201400 | -0.87900700 | -1.22286900 |
| C | -7.36175500  | -0.36312700 | -0.90370200 |
| C | -5.99072400  | -0.69395100 | -0.98130600 |
| H | -5.60274200  | -1.12826500 | -1.89958500 |
| C | -5.15577800  | -0.44258600 | 0.10858000  |
| C | -5.67137800  | 0.13073000  | 1.29311400  |
| H | -5.00146300  | 0.32005100  | 2.12518700  |
| C | -7.03553300  | 0.44519300  | 1.35924800  |
| C | -7.88939600  | 0.20525200  | 0.26068100  |
| H | -8.93684500  | 0.46991500  | 0.35877400  |
| C | -6.85234600  | 1.26051300  | 3.58821200  |
| H | -7.53641300  | 1.68199600  | 4.32819500  |
| H | -6.06149200  | 1.98855000  | 3.36213300  |
| H | -6.40265600  | 0.34029100  | 3.98518600  |
| C | -3.68853500  | -0.73454300 | 0.02823800  |
| C | -3.18863500  | -2.08450600 | 0.00811600  |
| C | -4.08544800  | -3.19966900 | 0.00628300  |
| H | -5.14654400  | -3.01457600 | 0.14919000  |
| C | -3.63775000  | -4.48793900 | -0.21674400 |
| H | -4.34537500  | -5.31452500 | -0.22807200 |
| C | -2.26383900  | -4.72290700 | -0.48324700 |
| H | -1.91926600  | -5.72063300 | -0.74683300 |
| C | -1.36128200  | -3.67540000 | -0.41526300 |
| H | -0.32120000  | -3.85681100 | -0.66095100 |
| C | -1.76942400  | -2.35148100 | -0.09050700 |
| C | -2.76511100  | 0.30491000  | -0.09330800 |
| C | -1.36418500  | 0.04572600  | -0.03982400 |
| C | -0.60597800  | 1.29650800  | -0.17878900 |
| C | -1.57808900  | 2.30572500  | -0.51782100 |
| C | -1.44728200  | 3.62300700  | -1.04177600 |
| H | -0.46923100  | 4.04295300  | -1.25051300 |



|   |             |             |             |
|---|-------------|-------------|-------------|
| C | -2.58614000 | 4.36600600  | -1.33283400 |
| H | -2.48274700 | 5.37069500  | -1.73688100 |
| C | -3.87656400 | 3.82493400  | -1.12298400 |
| H | -4.75488100 | 4.42774200  | -1.34543500 |
| C | -4.03941700 | 2.50773500  | -0.67173000 |
| H | -5.03606700 | 2.08904100  | -0.56444900 |
| C | -2.90625800 | 1.73391100  | -0.39438600 |
| C | 0.82370400  | 1.25389100  | -0.03755900 |
| O | 8.09245700  | 0.63038700  | 2.00769100  |
| O | 7.63599600  | -0.98854200 | -2.44109800 |
| C | 9.47216000  | 0.31553500  | 2.00300900  |
| H | 9.85227400  | 0.60522700  | 2.98518300  |
| H | 9.62980100  | -0.76098100 | 1.85053800  |
| H | 10.00201500 | 0.87900700  | 1.22286600  |
| C | 7.36175500  | 0.36312900  | 0.90370200  |
| C | 5.99072500  | 0.69395500  | 0.98130500  |
| H | 5.60274300  | 1.12827300  | 1.89958200  |
| C | 5.15577800  | 0.44258700  | -0.10858000 |
| C | 5.67137700  | -0.13073500 | -1.29311100 |
| H | 5.00146100  | -0.32005900 | -2.12518300 |
| C | 7.03553200  | -0.44519900 | -1.35924500 |
| C | 7.88939500  | -0.20525500 | -0.26068000 |
| H | 8.93684400  | -0.46992000 | -0.35877200 |
| C | 6.85234000  | -1.26052800 | -3.58820500 |
| H | 7.53640400  | -1.68201600 | -4.32818700 |
| H | 6.06148500  | -1.98856300 | -3.36212100 |
| H | 6.40265200  | -0.34030600 | -3.98518200 |
| C | 3.68853600  | 0.73454500  | -0.02823900 |
| C | 3.18863500  | 2.08450800  | -0.00811700 |
| C | 4.08544900  | 3.19967000  | -0.00628300 |
| H | 5.14654500  | 3.01457800  | -0.14919000 |
| C | 3.63775100  | 4.48794100  | 0.21674400  |
| H | 4.34537600  | 5.31452600  | 0.22807200  |
| C | 2.26384000  | 4.72290900  | 0.48324600  |
| H | 1.91926700  | 5.72063500  | 0.74683300  |
| C | 1.36128200  | 3.67540200  | 0.41526300  |
| H | 0.32120100  | 3.85681300  | 0.66095100  |
| C | 1.76942500  | 2.35148300  | 0.09050600  |
| C | 2.76511100  | -0.30490800 | 0.09330700  |
| C | 1.36418500  | -0.04572400 | 0.03982300  |
| C | 0.60597900  | -1.29650600 | 0.17878800  |
| C | 1.57808900  | -2.30572300 | 0.51782000  |
| C | 1.44728300  | -3.62300500 | 1.04177400  |
| H | 0.46923300  | -4.04295200 | 1.25051200  |

|   |             |             |            |
|---|-------------|-------------|------------|
| C | 2.58614100  | -4.36600400 | 1.33283100 |
| H | 2.48274900  | -5.37069400 | 1.73687800 |
| C | 3.87656600  | -3.82493200 | 1.12298000 |
| H | 4.75488300  | -4.42773900 | 1.34543100 |
| C | 4.03941800  | -2.50773300 | 0.67172600 |
| H | 5.03606800  | -2.08903800 | 0.56444500 |
| C | 2.90625900  | -1.73390900 | 0.39438400 |
| C | -0.82370300 | -1.25388900 | 0.03755800 |

Molecule 5 at M062X/6-31+G(d, p) level

|   |             |             |             |
|---|-------------|-------------|-------------|
| O | -8.04929500 | -0.75514500 | -1.96593400 |
| O | -7.57411900 | 1.11572500  | 2.37815400  |
| C | -9.42972700 | -0.42501300 | -1.95518500 |
| H | -9.82729900 | -0.76660500 | -2.90936200 |
| H | -9.57279900 | 0.65680800  | -1.86344500 |
| H | -9.94801600 | -0.93599300 | -1.13697900 |
| C | -7.31095400 | -0.42818100 | -0.87446800 |
| C | -5.94988100 | -0.76872300 | -0.93661000 |
| H | -5.56524700 | -1.25162700 | -1.82925800 |
| C | -5.11717300 | -0.46487100 | 0.13182600  |
| C | -5.62447000 | 0.17088700  | 1.27817400  |
| H | -4.95123000 | 0.40303600  | 2.09434300  |
| C | -6.97711800 | 0.49912900  | 1.32498900  |
| C | -7.83015700 | 0.20590800  | 0.24909500  |
| H | -8.87301600 | 0.48497100  | 0.33286400  |
| C | -6.75982100 | 1.46291900  | 3.48815400  |
| H | -7.42159800 | 1.94497900  | 4.20576800  |
| H | -5.96929000 | 2.15994300  | 3.19044900  |
| H | -6.31362100 | 0.57136300  | 3.94082800  |
| C | -3.65886100 | -0.75231100 | 0.06064900  |
| C | -3.15414800 | -2.09229300 | 0.05656200  |
| C | -4.03962100 | -3.20733300 | 0.07628500  |
| H | -5.09883200 | -3.02869000 | 0.22808300  |
| C | -3.58543500 | -4.48772300 | -0.13352700 |
| H | -4.28390900 | -5.31845400 | -0.12787500 |
| C | -2.21832700 | -4.71445300 | -0.40959000 |
| H | -1.87097700 | -5.70996100 | -0.66641700 |
| C | -1.32793400 | -3.66581200 | -0.36152800 |
| H | -0.28932800 | -3.83780800 | -0.61526200 |
| C | -1.74432400 | -2.34909400 | -0.04705700 |
| C | -2.75085000 | 0.28733000  | -0.07511100 |
| C | -1.35569600 | 0.03804200  | -0.02553700 |
| C | -0.61170100 | 1.28511000  | -0.18681800 |

|   |             |             |             |
|---|-------------|-------------|-------------|
| C | -1.58572500 | 2.27900400  | -0.53300500 |
| C | -1.46120500 | 3.57943000  | -1.08056200 |
| H | -0.48694400 | 3.99756300  | -1.30160600 |
| C | -2.59915100 | 4.30688700  | -1.38088900 |
| H | -2.50280000 | 5.30142700  | -1.80370800 |
| C | -3.87959200 | 3.76577000  | -1.16075700 |
| H | -4.75845200 | 4.35839000  | -1.39436400 |
| C | -4.03576500 | 2.46274200  | -0.68823800 |
| H | -5.02945800 | 2.04261900  | -0.57639800 |
| C | -2.90278500 | 1.70604900  | -0.39682100 |
| C | 0.81136900  | 1.25115600  | -0.05953000 |
| O | 8.04929400  | 0.75514300  | 1.96593500  |
| O | 7.57412000  | -1.11572200 | -2.37815500 |
| C | 9.42972600  | 0.42501200  | 1.95518600  |
| H | 9.82729700  | 0.76660300  | 2.90936400  |
| H | 9.57279800  | -0.65680900 | 1.86344500  |
| H | 9.94801500  | 0.93599300  | 1.13698200  |
| C | 7.31095300  | 0.42818000  | 0.87446800  |
| C | 5.94988100  | 0.76872100  | 0.93661000  |
| H | 5.56524500  | 1.25162400  | 1.82925800  |
| C | 5.11717300  | 0.46487100  | -0.13182600 |
| C | 5.62447000  | -0.17088600 | -1.27817500 |
| H | 4.95123100  | -0.40303500 | -2.09434500 |
| C | 6.97711900  | -0.49912800 | -1.32499000 |
| C | 7.83015700  | -0.20590700 | -0.24909500 |
| H | 8.87301600  | -0.48497000 | -0.33286300 |
| C | 6.75982400  | -1.46291500 | -3.48815600 |
| H | 7.42160100  | -1.94497400 | -4.20577000 |
| H | 5.96929200  | -2.15994000 | -3.19045200 |
| H | 6.31362300  | -0.57135900 | -3.94082900 |
| C | 3.65886100  | 0.75231100  | -0.06065000 |
| C | 3.15414800  | 2.09229200  | -0.05656400 |
| C | 4.03962100  | 3.20733200  | -0.07628500 |
| H | 5.09883200  | 3.02868900  | -0.22808400 |
| C | 3.58543500  | 4.48772300  | 0.13352600  |
| H | 4.28390900  | 5.31845300  | 0.12787500  |
| C | 2.21832700  | 4.71445200  | 0.40958900  |
| H | 1.87097700  | 5.70996000  | 0.66641600  |
| C | 1.32793400  | 3.66581100  | 0.36152700  |
| H | 0.28932800  | 3.83780700  | 0.61526100  |
| C | 1.74432400  | 2.34909400  | 0.04705600  |
| C | 2.75085000  | -0.28733000 | 0.07510900  |
| C | 1.35569600  | -0.03804300 | 0.02553600  |
| C | 0.61170100  | -1.28511100 | 0.18681600  |

|   |             |             |            |
|---|-------------|-------------|------------|
| C | 1.58572500  | -2.27900400 | 0.53300600 |
| C | 1.46120500  | -3.57942900 | 1.08056500 |
| H | 0.48694400  | -3.99756200 | 1.30160900 |
| C | 2.59915000  | -4.30688600 | 1.38089400 |
| H | 2.50279900  | -5.30142500 | 1.80371500 |
| C | 3.87959200  | -3.76576900 | 1.16076100 |
| H | 4.75845100  | -4.35838800 | 1.39437100 |
| C | 4.03576500  | -2.46274200 | 0.68824000 |
| H | 5.02945800  | -2.04261900 | 0.57639900 |
| C | 2.90278500  | -1.70605000 | 0.39682100 |
| C | -0.81136900 | -1.25115700 | 0.05952700 |

Molecule 5 at CAM-B3LYP/6-31+G(d, p) level

|   |             |             |             |
|---|-------------|-------------|-------------|
| O | -8.02179900 | 0.44781800  | 2.08537200  |
| O | -7.65472300 | -0.78653000 | -2.48971800 |
| C | -9.41238500 | 0.15574500  | 2.06936300  |
| H | -9.77453700 | 0.36930400  | 3.07387800  |
| H | -9.59152800 | -0.89818600 | 1.83349300  |
| H | -9.94020000 | 0.78892500  | 1.34903100  |
| C | -7.30713900 | 0.26594500  | 0.94298000  |
| C | -5.94151500 | 0.56993400  | 1.02687500  |
| H | -5.53699400 | 0.91937700  | 1.97015400  |
| C | -5.13013200 | 0.40987800  | -0.08621200 |
| C | -5.67021300 | -0.04825300 | -1.29790800 |
| H | -5.02064000 | -0.16783600 | -2.15474800 |
| C | -7.02796200 | -0.34074800 | -1.36745500 |
| C | -7.85645600 | -0.18936000 | -0.24785100 |
| H | -8.90589900 | -0.43168300 | -0.34962000 |
| C | -6.88442100 | -0.96574500 | -3.67075300 |
| H | -7.58043700 | -1.31875800 | -4.43024600 |
| H | -6.09886800 | -1.71307200 | -3.52044700 |
| H | -6.43660200 | -0.02168800 | -3.99693500 |
| C | -3.66911400 | 0.69681800  | -0.00794000 |
| C | -3.18382400 | 2.04229000  | 0.03500600  |
| C | -4.08738500 | 3.14017000  | 0.06202900  |
| H | -5.14382100 | 2.94680400  | -0.08019600 |
| C | -3.65866000 | 4.42004100  | 0.30823100  |
| H | -4.37370200 | 5.23586400  | 0.33869500  |
| C | -2.29567500 | 4.66275700  | 0.57354100  |
| H | -1.96226300 | 5.65627800  | 0.85507800  |
| C | -1.38892900 | 3.63403300  | 0.48410100  |
| H | -0.35398000 | 3.82395700  | 0.72991200  |
| C | -1.77934900 | 2.31909100  | 0.13661600  |

|   |             |             |             |
|---|-------------|-------------|-------------|
| C | -2.74475800 | -0.32904500 | 0.09068400  |
| C | -1.35466800 | -0.05647600 | 0.04225200  |
| C | -0.59098500 | -1.29687400 | 0.15335800  |
| C | -1.54829400 | -2.31647800 | 0.46613300  |
| C | -1.40894400 | -3.63672700 | 0.95318100  |
| H | -0.43191800 | -4.05228600 | 1.15732900  |
| C | -2.53399200 | -4.39518700 | 1.21438000  |
| H | -2.42197000 | -5.40644100 | 1.59109700  |
| C | -3.81934200 | -3.86795400 | 1.01017200  |
| H | -4.69032100 | -4.48446800 | 1.20790800  |
| C | -3.99018400 | -2.54948000 | 0.59715500  |
| H | -4.98743000 | -2.14061500 | 0.49400900  |
| C | -2.87123300 | -1.76118600 | 0.35281500  |
| C | 0.82954000  | -1.24002600 | 0.01049000  |
| O | 8.02179900  | -0.44781700 | -2.08537200 |
| O | 7.65472300  | 0.78653200  | 2.48971700  |
| C | 9.41238400  | -0.15574300 | -2.06936400 |
| H | 9.77453700  | -0.36930200 | -3.07387800 |
| H | 9.59152700  | 0.89818800  | -1.83349400 |
| H | 9.94020000  | -0.78892300 | -1.34903200 |
| C | 7.30713800  | -0.26594400 | -0.94298100 |
| C | 5.94151500  | -0.56993300 | -1.02687600 |
| H | 5.53699400  | -0.91937700 | -1.97015400 |
| C | 5.13013200  | -0.40987700 | 0.08621100  |
| C | 5.67021300  | 0.04825400  | 1.29790700  |
| H | 5.02064000  | 0.16783600  | 2.15474800  |
| C | 7.02796200  | 0.34075000  | 1.36745400  |
| C | 7.85645600  | 0.18936200  | 0.24785000  |
| H | 8.90589900  | 0.43168500  | 0.34961900  |
| C | 6.88442100  | 0.96574600  | 3.67075200  |
| H | 7.58043700  | 1.31876000  | 4.43024500  |
| H | 6.09886700  | 1.71307300  | 3.52044600  |
| H | 6.43660300  | 0.02168900  | 3.99693400  |
| C | 3.66911400  | -0.69681800 | 0.00794000  |
| C | 3.18382400  | -2.04229000 | -0.03500500 |
| C | 4.08738600  | -3.14017000 | -0.06202700 |
| H | 5.14382200  | -2.94680300 | 0.08019800  |
| C | 3.65866200  | -4.42004200 | -0.30822700 |
| H | 4.37370400  | -5.23586400 | -0.33869000 |
| C | 2.29567700  | -4.66275800 | -0.57353600 |
| H | 1.96226500  | -5.65628000 | -0.85507100 |
| C | 1.38893100  | -3.63403500 | -0.48409800 |
| H | 0.35398100  | -3.82396000 | -0.72990800 |
| C | 1.77934900  | -2.31909200 | -0.13661500 |

|   |             |            |             |
|---|-------------|------------|-------------|
| C | 2.74475800  | 0.32904500 | -0.09068400 |
| C | 1.35466800  | 0.05647500 | -0.04225300 |
| C | 0.59098400  | 1.29687300 | -0.15335900 |
| C | 1.54829400  | 2.31647600 | -0.46613400 |
| C | 1.40894300  | 3.63672500 | -0.95318400 |
| H | 0.43191700  | 4.05228300 | -1.15733300 |
| C | 2.53399000  | 4.39518500 | -1.21438300 |
| H | 2.42196800  | 5.40643900 | -1.59110200 |
| C | 3.81934100  | 3.86795300 | -1.01017400 |
| H | 4.69031900  | 4.48446700 | -1.20791000 |
| C | 3.99018300  | 2.54948000 | -0.59715500 |
| H | 4.98742900  | 2.14061500 | -0.49400700 |
| C | 2.87123200  | 1.76118500 | -0.35281500 |
| C | -0.82954000 | 1.24002500 | -0.01049000 |
